## Understanding pediatric long COVID using a tree-based scan statistic approach: An EHR-based cohort study from the RECOVER Program

### Corresponding author:

Vitaly Lorman  
Applied Clinical Research Center  
Children's Hospital of Philadelphia  
2716 South St  
Philadelphia, PA 19146  
[Lormanv@chop.edu](mailto:Lormanv@chop.edu)  
(267) 428-2845

### Authors:

Vitaly Lorman, PhD\*<sup>1</sup>, Hanieh Razzaghi, MPH\*<sup>1</sup>, Suchitra Rao, MBBS, MSCS<sup>2</sup>, Ravi Jhaveri, MD<sup>3</sup>, Abigail Case, MD<sup>4</sup>, Asuncion Mejias, MD, PhD, MsCS<sup>5</sup>, Nathan M. Pajor, MD, MS<sup>6</sup>, Payal Patel, MD<sup>7</sup>, Deepika Thacker, MD<sup>8</sup>, Seuli Bose-Brill, MD<sup>9</sup>, Jason Block, MD, MPH<sup>10</sup>, Patrick C. Hanley, MD, MSHQS<sup>11</sup>, Priya Prahalad, MD, PhD<sup>12</sup>, Yong Chen, PhD<sup>13</sup>, Christopher B. Forrest, MD, PhD<sup>1</sup>, L. Charles Bailey, MD, PhD<sup>1</sup>, Grace M. Lee, MD, MPH<sup>14</sup>

\*Co-first authorship

### Affiliations:

<sup>1</sup>Applied Clinical Research Center, Children's Hospital of Philadelphia, Philadelphia, PA, United States

<sup>2</sup>Department of Pediatrics, University of Colorado School of Medicine and Children's Hospital of Colorado, Aurora, CO, United States

<sup>3</sup>Division of Infectious Diseases, Ann & Robert H. Lurie Children's Hospital of Chicago, Chicago, IL

<sup>4</sup>Division of Physical Medicine & Rehabilitation, The Children's Hospital of Philadelphia, Philadelphia, PA, United States

<sup>5</sup>Division of Infectious Diseases, Department of Pediatrics, Nationwide Children's Hospital and The Ohio State University, Columbus, OH, United States

<sup>6</sup>Division of Pulmonary Medicine, Cincinnati Children's Hospital Medical Center and University of Cincinnati College of Medicine, Cincinnati, OH, United States

<sup>7</sup>Department of Neurology, University of Washington, Seattle, WA, United States

<sup>8</sup>Nemours Cardiac Center, Nemours Children's Health, Wilmington, DE, United States

<sup>9</sup>Internal Medicine and Pediatrics Section, Division of General Internal Medicine, Department of Internal Medicine, Ohio State University College of Medicine and Ohio State University Wexner Medical Center, Columbus, OH, United States

<sup>10</sup>Division of Chronic Disease Research Across the Lifecourse, Department of Population Medicine, Harvard Pilgrim Health Care Institute, Harvard Medical School, Boston, MA, United States

<sup>11</sup>Division of Endocrinology, Nemours Children's Hospital, Wilmington, DE, United States

<sup>12</sup>Department of Pediatrics, Division of Endocrinology, Stanford University, Stanford, CA, United States

<sup>13</sup>Department of Biostatistics, Epidemiology and Informatics, the University of Pennsylvania, Philadelphia, PA, United States

<sup>14</sup>Division of Infectious Diseases, Department of Pediatrics, Stanford University School of Medicine, Stanford, CA, United States

**Keywords:** Long COVID, Post-Acute Sequelae of SARS-CoV-2 Infection, COVID-19

**Word count:** 3854

## **STRUCTURED ABSTRACT**

### **Objectives**

Post-acute sequelae of SARS-CoV-2 infection (PASC) is not well defined in pediatrics given its heterogeneity of presentation and severity in this population. The aim of this study is to use novel methods that rely on data mining approaches rather than clinical experience to detect signals associated with PASC.

### **Materials and Methods**

We used a propensity-matched cohort design comparing children identified using the new PASC ICD10CM diagnosis code (U09.9) (N=1250) to children with (N=6250) and without (N=6250) SARS-CoV-2 infection. We used a tree-based scan statistic to identify potential condition clusters co-occurring more frequently in cases than controls.

### **Results**

We found significant enrichment among children with PASC in cardiac, respiratory, neurologic, psychological, endocrine, gastrointestinal, and musculoskeletal systems, the most significant related to circulatory and respiratory such as dyspnea, difficulty breathing, and fatigue and malaise.

### **Discussion**

Our study addresses methodological limitations of prior studies that rely on pre-specified clusters of potential PASC-associated diagnoses driven by clinician experience. Future studies are needed to identify patterns of diagnoses and their associations to derive clinical phenotypes.

### **Conclusion**

We identified multiple conditions and body systems associated with pediatric PASC. Because we rely on a data-driven approach, several new or under-reported conditions and symptoms were detected that warrant further investigation.

## BACKGROUND AND SIGNIFICANCE

The National Institutes of Health (NIH) launched the new RECOVER initiative in 2021 (1) to leverage electronic health record (EHR) data to better identify and characterize patients with post-acute sequelae of SARS-CoV-2 infection (PASC), defined by the NIH as failure to recover from COVID-19, or those persistently symptomatic for >30 days.(2) In the adult literature, advances have been made to predict PASC among COVID-19 affected patients (3) and to describe etiology, risk factors, and outcomes (4-7). In contrast, there is currently a paucity of rigorous studies that accurately describe PASC in children (8). Research attempting to better elucidate PASC in children has been limited by small sample sizes (9-11), lack of a control group (12-14), or restrictions in source population (15) that limit generalizability to a broader cohort. (17)

Access to EHR data in a large population of children offers an opportunity to better understand the spectrum of PASC across a wide range of demographics and clinical trajectories. A recent exploratory analysis using EHR data to characterize pediatric PASC examined symptoms, diagnoses, and medications occurring more frequently in a large cohort of SARS-CoV-2 viral test-positive patients when compared with SARS-CoV-2-negative controls. Similar studies have also been carried out in adult populations(7). However, these studies are limited in two important ways. First, SARS-CoV-2 positive patients are heterogeneous and therefore analyses are at risk for spurious associations attributable to residual confounding rather than significant clinical findings. Second and relatedly, studies of PASC-associated features employ outcomes defined by clusters of clinically similar diagnosis codes. Clustering clinical codes in this way may bias findings that confirm clinical experience. The rapidly evolving nature of the pandemic and the lack of consensus of specific symptoms that define PASC in children necessitates a more data-driven approach for knowledge discovery.(18)

In this study, we explored syndromic and systemic features associated with a clinical diagnosis of PASC compared to children with and without SARS-CoV-2 infection. The diagnosis code for PASC was established in October 2021 – *U09.9, post COVID-19 condition, unspecified*. Prior to this, the non-specific code, *B94.8, Sequelae of other specified infectious and parasitic diseases*, was proposed as a temporary alternative (19). While these codes reflect clinician judgment in diagnosing patients who may suffer from PASC, they are likely to have a higher positive predictive value than identifying cases using COVID-19- alone. To identify clusters of PASC-associated diagnoses from tens of thousands of diagnosis codes, we used a tree-based scan statistic, a data mining tool which detects signals from hierarchical structures without relying on pre-specifying the clusters of codes of interest. This data-driven technique is especially advantageous in EHR research where mining a large corpus of data is feasible.

## MATERIALS AND METHODS

### Study Population and Design

The RECOVER PEDSnet EHR population includes EHR data from nine children’s hospitals: Children’s Hospital of Philadelphia, Cincinnati Children’s Hospital Medical Center, Children’s Hospital of Colorado, Ann & Robert H. Lurie Children’s Hospital of Chicago, Nationwide

Children's Hospital, Nemours Children's Health System (in Delaware and Florida), Seattle Children's Hospital, and Stanford Children's Health. The Children's Hospital of Philadelphia's institutional review board designated this study as not human subjects research and the need for consent was waived. The PEDSnet COVID-19 Database Version week 115 was used. This study is part of the NIH Researching COVID to Enhance Recovery (RECOVER) Initiative, which seeks to understand, treat, and prevent the post-acute sequelae of SARS-CoV-2 infection (PASC). For more information on RECOVER, visit <https://recovercovid.org/>.

Our primary analyses focused on two comparisons of interest. Cases consisted of patients with evidence of PASC; the two comparator cohorts were patients with and without SARS-CoV-2 infection. Evidence for PASC comprised a U09.9 diagnosis code, an interface terminology (IMO) term in the EHR with the following strings: ('post' and 'acute' and 'covid') or ('complication' and 'covid'), or a B94.8 diagnosis code. Because the B94.8 code is more general, we did not include such diagnoses where the IMO term indicated something other than PASC. We excluded patients who had a MIS-C diagnosis at any point in time based on the presence of the M35.81, U10, and U10.9 ICD10CM diagnostic codes; therefore, we use 'PASC' to refer specifically to non-MIS-C variants. Patients were considered *SARS-COV-2 infected* if they had a diagnostic test that was positive for infection (Polymerase Chain Reaction (PCR), antigen, or serology). Serology tests included IgM, IgG anti- N antibodies, IgG anti-S or receptor binding domain (RBD) antibodies, and IgG and IgA undifferentiated antibodies based on criteria from Mejias et al. for positivity due to infection(20). Patients were also considered SARS-COV-2 infected if they had a diagnosis code for COVID-19 in the inpatient or emergency department (ED) setting. We excluded diagnosis codes for COVID-19 in the outpatient setting because of the possibility that the code was assigned as a rule-out diagnosis during a patient evaluation. Further, the observation period in the study aligned with the phase of the pandemic when viral testing was still widely performed in the healthcare setting. Patients were considered *SARS-COV-2 uninfected* if (1) all available diagnostic tests (PCR, Ag, serology) during the study period were negative and (2) the patient did not have any diagnosis codes indicating SARS-COV-2 infection, MIS-C, or PASC in any setting.

Cohort entry date for incident PASC cases was defined as: (1) the date of the first positive PCR or antigen test, or (2) 4 weeks before the date of the first positive serology test, or (3) 4 weeks before the first occurrence of a diagnosis of PASC if no preceding confirmatory test was available. We recognize that imposing a date of infection may misclassify the risk window between initial infection and PASC diagnosis if no testing data is available but chose to be overly inclusive of patients rather than exclude patients with the diagnosis based on unavailability of testing data. The cohort entry date for non-PASC SARS-CoV-2 infected patients was defined based on the date of the earliest SARS-CoV-2 diagnostic test (unless serology positive, then 4 weeks earlier) or earliest COVID-19 diagnosis/encounter. For SARS-CoV-2 uninfected patients, cohort entry dates were chosen as the date of a random negative test. All patients across case and control definitions were < 21 years of age at the date of cohort entry.

Additionally, we conducted a sensitivity analysis in which we compared SARS-CoV-2 positive to SARS-CoV-2 negative patients during the post-acute period—a description of the methods and results of this analysis are included in the supplementary appendix.

### **Matching**

We extracted data for our study from the RECOVER pediatric database by identifying any patient who met study inclusion criteria between March 1, 2020, and June 22, 2022. We used a propensity score matched approach to balance covariates between cases and each of the comparison groups to minimize potential confounding (21). Propensity scores were estimated using logistic regression as the probability of a PASC diagnosis conditional on the following covariates: institution, age group (<1, 1-4, 5-11, 12-15, 16-20 years), sex, race/ethnicity (white non-Hispanic (NH), Black NH, Hispanic, Asian NH, multi-racial NH, other NH), and clinical setting of testing. Additionally, we used the Pediatric Medical Complexity Algorithm (PMCA) (22) to define for each body system an index indicating presence and complexity of chronic condition in that body system grouping and used these PMCA indices in our propensity score model. We then matched PASC patients to comparison patients (SARS-CoV-2 infected patients in the first cohort, SARS-COV-2 uninfected patients in the second cohort) using 5:1 nearest neighbor matching, additionally requiring exact matching on both cohort entry month and age group (23). We assessed the balance between the SARS-CoV-2 infected and uninfected patients via absolute standardized mean differences.

### **Tree-based scan statistic**

The tree-based scan statistic is a data mining tool that is well established in vaccine safety(24) and disease surveillance and characterization(24, 25), making it salient for applications to understand pediatric PASC in its early stages of characterization. This approach simultaneously evaluates outcomes at different levels of granularity in a hierarchical structure, adjusting for multiple testing using a likelihood ratio statistic. In this study, we employed the unconditional analysis based on a Bernoulli probability model at each node of the tree, as described in the TreeScan User's Guide(26). This approach identifies branches of the tree at which outcomes belonged most disproportionately to cases as compared to controls.

As inputs, we used the ICD10CM vocabulary following the ICD10CM Tabular List of Diseases and Injuries(27) as developed by the National Center for Health Statistics (NCHS). For example, a path down the hierarchy might proceed as follows: C00-D49-> C00-C97 -> C44 -> C44.1 -> C44.10 -> C44.102 -> C44.1021. In all, the hierarchy has 7 levels, with the following counts of nodes per level starting from the top down: 22, 262, 2274, 9502, 14400, 22236, 48450.

We will alternately refer to the hierarchy as a tree, and the cluster consisting of a node together with all of its descendants will be referred to as a *branch* of the tree, or equivalently, as a *cut*. For each branch of the tree, we started with the observed count of cases who had an incident diagnosis in that branch during the outcome period. We also calculated the expected number of cases for each branch by multiplying the proportion of cases in the cohort (1/6 due to 5:1 matching) by the number of controls who had an incident diagnosis in the branch. The null hypothesis, for each cut, is that the number of observed cases equals the number of expected

cases. This method adjusts for multiple testing in the sense that under the null hypothesis that the number of observed cases equals the number of expected cases at each cut, there is a 95% probability that there is no cut in the tree with a p-value <0.05. For each cut demonstrating significance at the p<0.05 threshold, we calculated percent excess cases as the difference between number of observed cases and the number of expected cases divided by the number of expected cases. Analyses were carried out using R (4.1.0) and Treescan (2.0) software. Subclassification matching was implemented using the MatchIt R package and tree visualizations were built using the collapsibleTree R package.

## Outcomes

For each patient and each diagnosis code, we calculated a binary indicator for whether the patient had an incident occurrence of that diagnosis code during the 28-179 days following cohort entry. We then used these to compute for each diagnosis code, and consequently each cluster of diagnosis codes defined by a branch of the tree, the number of cases and controls who had an incident diagnosis in that branch.

To define incident outcomes, we employed a washout period between 18 months and 7 days prior to cohort entry for conditions grouped at the 3<sup>rd</sup> level of the ICD hierarchy (i.e., the part of the ICD code before the decimal place) to ensure new incident diagnoses. In other words, conditions which occurred during the study period were not counted if a code in the same group occurred during the washout period. We also a priori excluded a handful of outcomes that were deemed unlikely to be attributable to COVID-19, specifically injury codes (S00-T98), external causes of morbidity and mortality (V01-Y98), and congenital malformations, deformations and chromosomal abnormalities (Q00-Q99).

## RESULTS

### Study population and matching

Between March 1, 2020, and June 22, 2022, there was a total of 13,750 patients identified for inclusion into the 3 cohorts, with PASC cases accounting for 1,250 patients (Table 1a). Older children and females were more likely to be included in the PASC cohort than younger children and males (overall: 55.2% vs 44.8%). The most common cohort entry months were in the fall of 2021. A majority of children in the PASC cohort (55.1%) did not have any chronic conditions. Following 5:1 nearest neighbor matching, both comparison cohorts had excellent balance ( $|SMD| < 0.2$  for unknown test location and one site,  $|SMD| < 0.1$  for all other variables). (Supplementary Appendix Figures 1a-b). After matching, the demographic distributions of both COVID-positive and COVID-negative cohorts reflect those of the PASC cohort.

### TreeScan

When comparing patients with PASC to patients who were SARS-CoV-2 infected, we identified multiple statistical signals. At the highest level of the tree, significant cuts included R00-R99 Symptoms, signs and abnormal clinical and laboratory findings, not elsewhere classified, M00-M99 Diseases of the musculoskeletal system and connective tissue, G00-G99 Diseases of the nervous system, J00-J99 Diseases of the respiratory system, F00-F99 Mental and behavioral disorders, E00-E90 Endocrine, nutritional, and metabolic diseases, I00-I99 Diseases of the

circulatory system, Z00-Z99 Factors influencing health status and contact with health services, L00-L99 Diseases of the skin and subcutaneous tissue, and K00-K93 Diseases of the digestive system.

Within the R00-R99 branch, the top three cuts were R00-R09 Symptoms and signs involving the circulatory and respiratory systems, R50-R69 General symptoms and signs and R40-R46 Symptoms and signs involving cognition, perception, emotional state and behavior. Within the R00-R09 branch, the three most significant cuts included R06.0 Dyspnea, R07 Pain in throat and chest, R09.9 Chest pain, unspecified. This part of the hierarchy is visualized in Figure 3a.

The PASC vs SARS-CoV-2 negative comparison showed significance for 283 cuts, and largely overlapped with the PASC vs SARS-CoV-2 negative comparison at the top of the tree, with the addition of H00-H59 Diseases of the eye and adnexa.

We refer the reader to Table 2 for a summary of systemic and syndromic findings collected from the two comparisons and Tables 3a and 3b for a full list of significant cuts, the likelihood ratio statistics, p-values, and percent excess cases.

## DISCUSSION

We have employed a tree-based data mining approach to detect new-onset conditions presenting in children with a PASC (U09.9 or B94.8) diagnosis. Our data-driven approach identified and ranked features in a large corpus of EHR data. In the first of our two primary analyses, we compared PASC-diagnosed patients with non-PASC-diagnosed SARS-CoV-2 positive patients. The signals identified indicate long term sequelae of PASC that differentiate from having COVID-19.

Significant results from this comparison included both systemic and syndromic manifestations of PASC, with the former describing organ-level dysfunction and the latter focusing on signs and symptoms. Consistent with other studies and biologic mechanisms, we found significant enrichment among children with PASC in cardiac, respiratory, neurologic, psychological, endocrine, gastrointestinal, and musculoskeletal systems(28) .

We found the most significant point of difference between PASC and COVID-19 positive children was at the R00-R99 cluster of diagnostic codes (*Symptoms, signs, and abnormal clinical and laboratory findings, not otherwise classified*). These codes designate abnormal clinical findings not elsewhere described that encompass a range of organ systems. This is not surprising given the heterogeneity of previously reported manifestations of PASC and the difficulty in gaining clinical consensus to define PASC(29, 30).

Within the R00-R99 category, the codes with the greatest signal are symptoms related to circulatory and respiratory systems. These results align again with prior observations in smaller groups of patients or previous studies, and include dyspnea(12, 17), shortness of breath(17, 32), and other breathing abnormalities(33); chest pain(10, 34, 35); malaise and fatigue(14, 32,



35, 36); cough(14); and abnormalities of heartbeat including palpitations and tachycardia(37, 38).

Neurologic diagnoses such as headache and migraine as well as sleep disturbances are significant cuts and have also been previously reported (12, 33). Generalized pain was a key feature in our musculoskeletal system findings, which include non-localized myalgias, joint pain, and generalized soft tissue pain. The recurring appearance of multiple and diverse pain symptoms in this study warrants further investigation to better characterize causal biologic pathways.

Respiratory conditions were also significantly featured in our analysis. Both vocal cord disorders and dysautonomia were present as PASC-related features in our study. Interestingly, new onset asthma was present in our results as a specific diagnosis rather than a constellation of non-specific symptoms. Asthma is one of the few specific health conditions with a significant and strong signal in our study. Respiratory findings associated with PASC have been characterized in detail elsewhere (9).

In contrast to previous work, our study did not identify new-onset diabetes as a persistent long-term complication of COVID-19 (40). Endocrine findings in this study included nutritional deficiencies, volume depletion or fluid overload, and obesity. To our knowledge, these symptoms have not been described in detail elsewhere. It is unclear whether clinicians are recording obesity in the post-infection period as an indication that obesity complicated recovery of SARS-CoV-2 infection or that it points to a patient's exacerbation of health conditions unrelated to COVID-19.

Gastrointestinal (e.g., *Diseases of esophagus, stomach and duodenum*) and psychological findings (e.g., *Reaction to severe stress, and adjustment disorders*) followed a pattern of TreeScan cuts primarily at non-specific levels. Future work should focus on characterizing co-occurrences of these non-specific symptoms across body systems to detect clinically meaningful patterns.

We also compared children with a PASC diagnosis code to SARS-CoV-2 test-negative patients. The majority of cuts from this comparator cohort overlap with the findings where SARS-CoV-2 test-positive patients served as the control. These demonstrate consistency and increase the likelihood that these findings are truly associated with PASC. Additionally, several diagnoses unique to the test-negative cohort were identified, many of which include symptoms relating to acute respiratory infection. Some specific infection codes, such as B25, *Cytomegaloviral Disease* (CMV) were found significant, which may be a result of reactivation in patients infected with SARS-CoV-2(41). Other codes, such as D89, *Other disorders involving the immune mechanism, not elsewhere classified*, or skin conditions such as dermatitis and eczema (L20-L30), were also enriched in the PASC patients when compared to SARS-CoV-2 negative patients. Autoimmunity following an infection has been documented and warrants further investigation in the pediatric population(42). Alternate findings enriched in this analysis include features plausibly associated with COVID-19 infection including acute myocarditis, hypotension, fever, nasal congestion,

epistaxis, tachycardia, and gastrointestinal symptoms such as diarrhea, constipation, and gastroenteritis. More serious conditions such as pulmonary embolism and pulmonary edema were also enriched in this population but may be due to follow up care from an acute COVID-19 infection, and not a new finding in the post-acute period. However, these findings warrant further investigation. Findings such as sleep apnea, or behavioral codes associated with restlessness and agitation and disorientation, may also be plausibly associated with post-acute sequelae of COVID-19 infection.

Compared to previous work identifying pediatric PASC features by comparing SARS-CoV-2 test-positive to test-negative patients in the PEDSnet EHR, we found several differences. Abnormal liver enzymes, allergies, disorders of teeth/gingiva, and bronchiolitis were all reported as potential PASC-associated features in [18] but were not identified as significant cuts in this study when PASC patients were compared to COVID+ or COVID- cohorts, either at the specific code or macro level. Conversely, significant findings in our study which were not present in [18] included sleep disorders, anemias, eye disorders, constipation, sepsis, nutritional deficiencies, hypotension, and various musculoskeletal conditions and soft tissue and muscle disorders.

Finally, we conducted a sensitivity analysis comparing COVID positive to COVID negative patients. By identifying events that occur in the PASC risk window more frequently in COVID-positive patients, we can increase the sensitivity of capturing potential PASC features. This may come at the expense of precision, as we recognize that statistical signals identified in this analysis may correspond to features not truly associated with PASC, either due to confounding resulting from a more heterogeneous population than PASC-diagnosed patients or due to surveillance bias due to COVID-positivity. While there was significant overlap of the features identified in this and the primary analyses, there were also many additional features identified in the COVID-positive to COVID-negative analysis. This discrepancy may be due to either the increased power resulting from the larger cohort in the sensitivity analysis, or the result of confounding or surveillance bias described above. Further investigation of these signals is warranted.

To our knowledge, our study is the first to employ a TreeScan approach in children to detect groups of clinical diagnoses specific to this population, as well as the first to make use of the U09.9 and B94.8 diagnosis codes to do so. Our study is strengthened by multiple comparison groups diagnoses of PASC rather than surveys or case series analyses. We have confirmed previous findings and provide new insights into how diagnosis clusters relate to each other in importance. Further, an advantage of EHR data is the ability to learn from previous clinical history of patients. In our analysis, we included an 18-month washout period to ensure that the signals we were observing were not due to baseline differences in disease prevalence. Prior work identifying pediatric PASC-associated features [18] relied on a set of diagnosis clusters developed by the study team to group similar diagnoses. Our study addresses this methodological limitation by a broader approach where diagnosis clusters are tested along all levels of the ICD-10-CM hierarchy. Importantly, among features of PASC found in previous work, our study contributes precise, diagnosis code-level results showing how PASC features

are identified in clinical practice. This makes our findings ideally suited for development of rules-based phenotypes for identifying pediatric PASC in EHRs.

At the same time, there were several significant limitations to our study. First, we are at risk of misclassifying patients in our PASC-negative comparator cohort by relying solely on the U09.9 and B94.8 codes to identify cases. There are likely children and adolescents in our comparison cohort with complications of COVID-19 who never receive a formal PASC diagnosis and may either present to a health system with symptoms that the clinician did not distinguish as a complication of COVID-19 or may not receive care for their symptoms at all. However, this would likely bias toward the null. Further, the U09.9 code has only been formally implemented since October 2021, and while the B94.8 code likely served as a proxy for PASC prior to this, the likely lack of uniform code usage, particularly early in the pandemic, introduces potential bias with regards to the timing of cohort entry dates in our cohort during the pandemic.

Additionally, for PASC-diagnosed and serology test positive patients in our cohort who had no prior COVID diagnoses or positive viral testing, our imputation of cohort entry dates may not accurately reflect timing of COVID infection, and in the case of PASC-diagnosed patients, PASC onset. Second, our ascertainment of other diagnosis codes is similarly subject to the biases of health care delivery. For example, our findings may disproportionately include diagnoses that are required for utilization (*e.g.*, to justify diagnostic testing) or symptoms that are uncommon and previously associated in clinical practice with COVID-19 and may under-detect changes following COVID-19 in relatively common childhood illness that escape coding practices. Third, we have analyzed the pandemic as a single cross-section, and further information may be gained by studying evolution of diagnoses over time since infection, or across different portions of the pandemic. Finally, the cohort is composed of patients followed in large pediatric health systems, and results may reflect the largely urban demographics of these systems or the practice patterns of pediatric specialists.

## **CONCLUSION**

This systematic evaluation of diagnoses in a large, multi-system national cohort of children with PASC provides a valuable addition to our understanding of this condition's protean manifestations. Our results can inform the design of further prospective studies to more deeply investigate the patterns identified here to develop improved clinical practice and to direct the study of the biological basis of PASC.

Table 1. Study population characteristics after matching

|                                       | Level                            | Overall<br>N (%) | SARS CoV-2-<br>negative<br>N (%) | SARS CoV-2-<br>positive<br>N (%) | PASC<br>N (%) |
|---------------------------------------|----------------------------------|------------------|----------------------------------|----------------------------------|---------------|
| <b>n</b>                              |                                  | 13,750           | 6,250                            | 6,250                            | 1,250         |
| <b>Age at cohort<br/>entrance (%)</b> | <1                               | 440 (3.2)        | 200 (3.2)                        | 200 (3.2)                        | 40 (3.2)      |
|                                       | 1-4                              | 1276 (9.3)       | 580 (9.3)                        | 580 (9.3)                        | 116 (9.3)     |
|                                       | 5-11                             | 3542 (25.8)      | 1610 (25.8)                      | 1610 (25.8)                      | 322 (25.8)    |
|                                       | 12-15                            | 4620 (33.6)      | 2100 (33.6)                      | 2100 (33.6)                      | 420 (33.6)    |
|                                       | 16-20                            | 3872 (28.2)      | 1760 (28.2)                      | 1760 (28.2)                      | 352 (28.2)    |
| <b>Sex (%)</b>                        | <b>Female</b>                    | 7577 (55.1)      | 3400 (54.4)                      | 3487 (55.8)                      | 690 (55.2)    |
|                                       | <b>Male</b>                      | 6173 (44.9)      | 2850 (45.6)                      | 2763 (44.2)                      | 560 (44.8)    |
| <b>Race/ethnicity<br/>(%)</b>         | <b>Non-Hispanic<br/>Asian/PI</b> | 422 (3.1)        | 186 (3.0)                        | 196 (3.1)                        | 40 (3.2)      |
|                                       | <b>Non-Hispanic<br/>Black/AA</b> | 1255 (9.1)       | 555 (8.9)                        | 583 (9.3)                        | 117 (9.4)     |
|                                       | <b>Hispanic</b>                  | 2017 (14.7)      | 905 (14.5)                       | 928 (14.8)                       | 184 (14.7)    |
|                                       | <b>Multiple</b>                  | 566 (4.1)        | 254 (4.1)                        | 260 (4.2)                        | 52 (4.2)      |
|                                       | <b>Other/Unkno<br/>wn</b>        | 700 (5.1)        | 316 (5.1)                        | 312 (5.0)                        | 72 (5.8)      |
|                                       | <b>Non-Hispanic<br/>White</b>    | 8790 (63.9)      | 4034 (64.5)                      | 3971 (63.5)                      | 785 (62.8)    |
| <b>Cohort entry<br/>month (%)</b>     | <b>Mar 2020</b>                  | 77 ( 0.6)        | 35 ( 0.6)                        | 35 ( 0.6)                        | 7 ( 0.6)      |
|                                       | <b>Apr 2020</b>                  | 132 (1.0)        | 60 (1.0)                         | 60 (1.0)                         | 12 (1.0)      |
|                                       | <b>May 2020</b>                  | 88 (0.6)         | 40 (0.6)                         | 40 (0.6)                         | 8 (0.6)       |
|                                       | <b>Jun 2020</b>                  | 165 (1.2)        | 75 (1.2)                         | 75 (1.2)                         | 15 (1.2)      |
|                                       | <b>Jul 2020</b>                  | 154 (1.1)        | 70 (1.1)                         | 70 (1.1)                         | 14 (1.1)      |
|                                       | <b>Aug 2020</b>                  | 110 ( 0.8)       | 50 ( 0.8)                        | 50 (0.8)                         | 10 (0.8)      |
|                                       | <b>Sep 2020</b>                  | 231 (1.7)        | 105 (1.7)                        | 105 (1.7)                        | 21 (1.7)      |
|                                       | <b>Oct 2020</b>                  | 242 (1.8)        | 110 (1.8)                        | 110 (1.8)                        | 22 (1.8)      |
|                                       | <b>Nov 2020</b>                  | 385 (2.8)        | 175 (2.8)                        | 175 (2.8)                        | 35 (2.8)      |
|                                       | <b>Dec 2020</b>                  | 396 (2.9)        | 180 (2.9)                        | 180 (2.9)                        | 36 (2.9)      |
|                                       | <b>Jan 2021</b>                  | 506 (3.7)        | 230 (3.7)                        | 230 (3.7)                        | 46 (3.7)      |
|                                       | <b>Feb 2021</b>                  | 264 (1.9)        | 120 (1.9)                        | 120 (1.9)                        | 24 (1.9)      |
|                                       | <b>Mar 2021</b>                  | 451 (3.3)        | 205 (3.3)                        | 205 (3.3)                        | 41 (3.3)      |
|                                       | <b>Apr 2021</b>                  | 473 (3.4)        | 215 (3.4)                        | 215 (3.4)                        | 43 (3.4)      |
|                                       | <b>May 2021</b>                  | 341 (2.5)        | 155 (2.5)                        | 155 (2.5)                        | 31 (2.5)      |
|                                       | <b>Jun 2021</b>                  | 495 (3.6)        | 225 (3.6)                        | 225 (3.6)                        | 45 (3.6)      |
|                                       | <b>Jul 2021</b>                  | 517 (3.8)        | 235 (3.8)                        | 235 (3.8)                        | 47 (3.8)      |
| <b>Aug 2021</b>                       | 792 (5.8)                        | 360 (5.8)        | 360 (5.8)                        | 72 (5.8)                         |               |

It is made available under a [CC-BY-NC-ND 4.0 International license](https://creativecommons.org/licenses/by-nc-nd/4.0/) .

|                          |                              |             |             |             |            |
|--------------------------|------------------------------|-------------|-------------|-------------|------------|
|                          | <b>Sep 2021</b>              | 1474 (10.7) | 670 (10.7)  | 670 (10.7)  | 134 (10.7) |
|                          | <b>Oct 2021</b>              | 1188 (8.6)  | 540 (8.6)   | 540 (8.6)   | 108 (8.6)  |
|                          | <b>Nov 2021</b>              | 1122 (8.2)  | 510 (8.2)   | 510 (8.2)   | 102 (8.2)  |
|                          | <b>Dec 2021</b>              | 1958 (14.2) | 890 (14.2)  | 890 (14.2)  | 178 (14.2) |
|                          | <b>Jan 2022</b>              | 2189 (15.9) | 995 (15.9)  | 995 (15.9)  | 199 (15.9) |
| <b>Institution (%)</b>   | <b>A</b>                     | 1039 (7.6)  | 518 (8.3)   | 437 (7.0)   | 84 (6.7)   |
|                          | <b>B</b>                     | 1565 (11.4) | 692 (11.1)  | 715 (11.4)  | 158 (12.6) |
|                          | <b>C</b>                     | 2553 (18.6) | 1191 (19.1) | 1125 (18.0) | 237 (19.0) |
|                          | <b>D</b>                     | 397 (2.9)   | 177 (2.8)   | 183 (2.9)   | 37 (3.0)   |
|                          | <b>E</b>                     | 1048 (7.6)  | 437 (7.0)   | 513 (8.2)   | 98 (7.8)   |
|                          | <b>F</b>                     | 546 (4.0)   | 262 (4.2)   | 224 (3.6)   | 60 (4.8)   |
|                          | <b>G</b>                     | 1307 (9.5)  | 594 (9.5)   | 600 (9.6)   | 113 (9.0)  |
|                          | <b>H</b>                     | 2385 (17.3) | 1041 (16.7) | 1121 (17.9) | 223 (17.8) |
|                          | <b>I</b>                     | 2910 (21.2) | 1338 (21.4) | 1332 (21.3) | 240 (19.2) |
| <b>Test Location (%)</b> | <b>Emergency Department</b>  | 2179 (15.8) | 969 (15.5)  | 1032 (16.5) | 178 (14.2) |
|                          | <b>Inpatient</b>             | 1835 (13.3) | 782 (12.5)  | 891 (14.3)  | 162 (13.0) |
|                          | <b>Other/Unknown</b>         | 80 (0.6)    | 37 (0.6)    | 10 (0.2)    | 33 (2.6)   |
|                          | <b>Outpatient Office</b>     | 6019 (43.8) | 2792 (44.7) | 2671 (42.7) | 556 (44.5) |
|                          | <b>Outpatient: Test Only</b> | 3637 (26.5) | 1670 (26.7) | 1646 (26.3) | 321 (25.7) |
| <b>PMCA Index (%)</b>    | <b>0</b>                     | 7436 (54.1) | 3370 (53.9) | 3377 (54.0) | 689 (55.1) |
|                          | <b>1</b>                     | 4339 (31.6) | 1948 (31.2) | 2013 (32.2) | 378 (30.2) |
|                          | <b>2</b>                     | 1975 (14.4) | 932 (14.9)  | 860 (13.8)  | 183 (14.6) |

Table 2: Summary of significant features in the two comparison cohorts

| Major systemic findings, or conditions (general and specific) |                                                                                                                                                                                                            |
|---------------------------------------------------------------|------------------------------------------------------------------------------------------------------------------------------------------------------------------------------------------------------------|
| Diseases of the nervous system                                | migraines, headache syndromes, sleep disorders, insomnia, chronic pain, dysautonomia, post-viral fatigue syndrome, encephalitis, disorders of autonomic nervous system, sleep apnea*, transverse myelitis* |
| Mental and behavioral disorders                               | anxiety disorders, severe stress and adjustment disorders, organic including symptomatic mental disorders, obsessive-compulsive disorder, dissociative and conversion disorders*                           |
| Diseases of the respiratory system                            | asthma, ARDS/respiratory failure, diseases of vocal cords and larynx, tonsillitis, exercise induced bronchospasm*, chronic sinusitis*, pulmonary edema*,                                                   |
| Diseases of the circulatory system                            | arrhythmias, cerebrovascular disease, thromboembolic disease, acute myocarditis*, hypotension*, pulmonary embolism*, tachycardia*,                                                                         |
| Disease of the musculoskeletal system and connective tissue   | pain in joints, pain in limbs, dorsalgia, myalgias, hypermobility syndrome, soft tissue disorders, muscle disorders, arthropathies, osteopathies, disorders of bone, reactive arthritis, physal arrest     |
| Diseases of the digestive system                              | Diseases of oesophagus, stomach, and duodenum, aphagia and dysphagia                                                                                                                                       |
| Diseases of blood                                             | purpura and other hemorrhagic conditions*, anemias*, sickle cell disorders*                                                                                                                                |
| Endocrine, nutritional and metabolic diseases                 | nutritional deficiencies, obesity and overweight, disorders of mineral metabolism, volume depletion or fluid overload, obesity                                                                             |
| Renal                                                         | Acute kidney failure*                                                                                                                                                                                      |
| Diseases of the eye                                           | Disorders of refraction and accommodation*                                                                                                                                                                 |
| Immunologic findings                                          | Other disorders involving the immune mechanism not elsewhere classified, cytomegaloviral disease*                                                                                                          |
| Major syndromic findings, or symptoms                         |                                                                                                                                                                                                            |
| Circulatory and respiratory signs and symptoms                | Palpitations, cough, dyspnea, shortness of breath, chest pain, viral pneumonia, asphyxia and hypoxemia*, hyperglycemia*                                                                                    |
| GI signs/symptoms                                             | abdominal pain, nausea/vomiting, diarrhea*, constipation*, gastroenteritis*                                                                                                                                |
| CNS/musculoskeletal signs/symptoms                            | lack of coordination, abnormalities of gait and mobility                                                                                                                                                   |
| Cognition, perception,                                        | dizziness, smell/taste disturbances, restlessness and agitation*,                                                                                                                                          |

|                            |                                                                                                                                                                                                          |
|----------------------------|----------------------------------------------------------------------------------------------------------------------------------------------------------------------------------------------------------|
| emotional state            | disorientation*, shock*                                                                                                                                                                                  |
| General signs and symptoms | Fatigue/malaise, headache, weakness, syncope and collapse, pain not elsewhere classified, fever*, enlarged lymph node, nasal congestion*, epistaxis*, noninflammatory disorders of female genital tract* |
| Skin                       | Symptoms and signs involving the skin and subcutaneous tissue, dermatitis, * eczema, * urticaria* and erythema*                                                                                          |

\*Findings significant in PASC vs COVID-negative comparison but not PASC vs COVID-positive comparison

It is made available under a [CC-BY-NC-ND 4.0 International license](https://creativecommons.org/licenses/by-nc-nd/4.0/).

Figure 3a: Significant branches of the R00-R09 block of the ICD hierarchy with nodes colored by percent excess cases

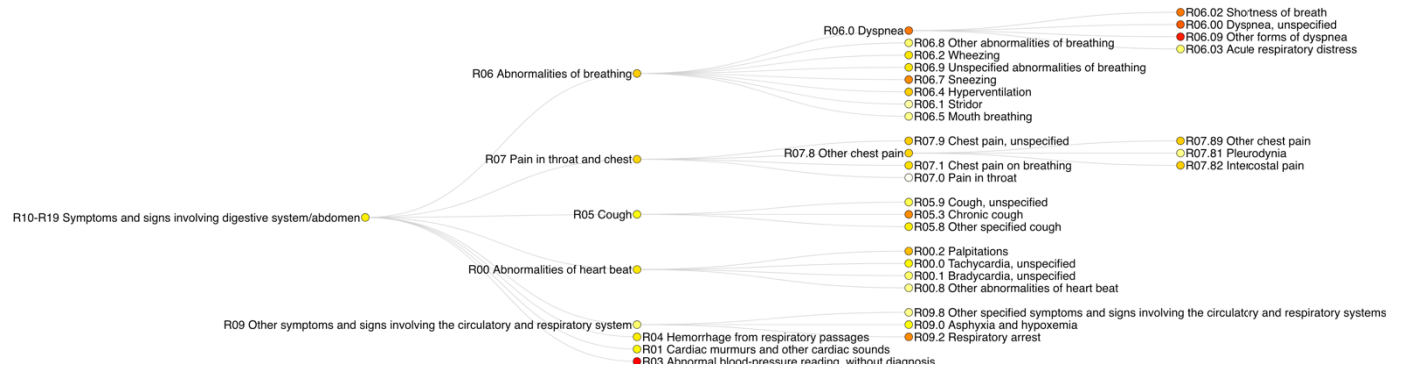

Figure 3b: Significant branches of the R10-R19 block of the ICD hierarchy with nodes colored by percent excess cases

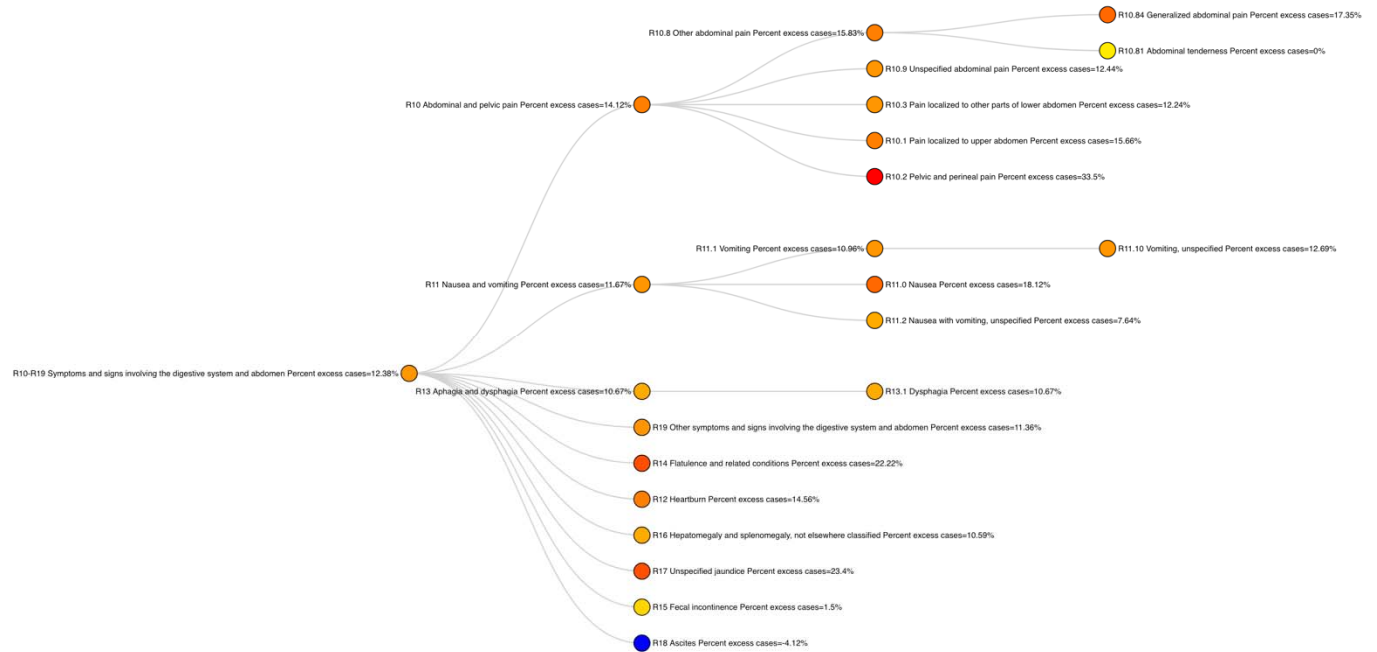



Table 3a: PASC vs COVID positive comparison TreeScan results

| Cut                                                                                                                | Node                                                                                                        | Tree Level | Log Likelihood Ratio | P value | N cases observed | N cases expected | Percent excess cases |
|--------------------------------------------------------------------------------------------------------------------|-------------------------------------------------------------------------------------------------------------|------------|----------------------|---------|------------------|------------------|----------------------|
| <b>A00-B99 Certain infections and parasitic diseases</b>                                                           |                                                                                                             |            |                      |         |                  |                  |                      |
| 6                                                                                                                  | B90-B94 Sequelae of infectious and parasitic diseases                                                       | 2          | 327.89               | 0.001   | 183              | 30.50            | 500.00               |
| 7                                                                                                                  | B94 Sequelae of other and unspecified infectious and parasitic diseases                                     | 3          | 327.89               | 0.001   | 183              | 30.50            | 500.00               |
| 8                                                                                                                  | B94.8 Sequelae of other specified infectious and parasitic diseases                                         | 4          | 326.10               | 0.001   | 182              | 30.33            | 500.07               |
| 14                                                                                                                 | A00-B99 Certain infections and parasitic diseases                                                           | 1          | 157.15               | 0.001   | 1,006            | 167.67           | 141.55               |
| 139                                                                                                                | B95-B98 Bacterial, viral and other infectious agents                                                        | 2          | 11.37                | 0.002   | 259              | 43.17            | 71.42                |
| 148                                                                                                                | B97 Viral agents as the cause of diseases classified elsewhere                                              | 3          | 10.81                | 0.005   | 120              | 20.00            | 105.00               |
| 149                                                                                                                | A65-A69 Other spirochaetal diseases                                                                         | 2          | 10.68                | 0.009   | 16               | 2.67             | 311.99               |
| 158                                                                                                                | B25-B34 Other viral diseases                                                                                | 2          | 10.00                | 0.014   | 214              | 35.67            | 73.82                |
| <b>D50-D89 Diseases of the blood and blood-forming organs and certain disorders involving the immune mechanism</b> |                                                                                                             |            |                      |         |                  |                  |                      |
| 33                                                                                                                 | D89.89 Other specified disorders involving the immune mechanism, not elsewhere classified                   | 5          | 55.21                | 0.001   | 44               | 7.33             | 432.06               |
| 49                                                                                                                 | D50-D89 Diseases of the blood and blood-forming organs and certain disorders involving the immune mechanism | 1          | 39.94                | 0.001   | 901              | 150.17           | 71.81                |
| 56                                                                                                                 | D89 Other disorders involving the immune                                                                    | 3          | 35.01                | 0.001   | 93               | 15.50            | 229.03               |

|                                                              |                                                                                          |   |       |       |       |        |        |
|--------------------------------------------------------------|------------------------------------------------------------------------------------------|---|-------|-------|-------|--------|--------|
|                                                              | mechanism, not elsewhere classified                                                      |   |       |       |       |        |        |
| <b>58</b>                                                    | D89.8 Other specified disorders involving the immune mechanism, not elsewhere classified | 4 | 32.12 | 0.001 | 83    | 13.83  | 232.61 |
| <b>72</b>                                                    | D80-D89 Certain disorders involving the immune mechanism                                 | 2 | 23.01 | 0.001 | 287   | 47.83  | 98.62  |
| <b>E00-E90 Endocrine, nutritional and metabolic diseases</b> |                                                                                          |   |       |       |       |        |        |
| <b>30</b>                                                    | E00-E90 Endocrine, nutritional and metabolic diseases                                    | 1 | 60.96 | 0.001 | 1,480 | 246.67 | 69.05  |
| <b>51</b>                                                    | E70-E88 Metabolic disorders                                                              | 2 | 39.53 | 0.001 | 631   | 105.17 | 86.36  |
| <b>112</b>                                                   | E87 Other disorders of fluid, electrolyte and acid-base balance                          | 3 | 15.36 | 0.001 | 194   | 32.33  | 97.96  |
| <b>113</b>                                                   | E65-E68 Obesity and other hyperalimentation                                              | 2 | 15.28 | 0.001 | 182   | 30.33  | 101.12 |
| <b>119</b>                                                   | E66 Overweight and obesity                                                               | 3 | 14.12 | 0.001 | 179   | 29.83  | 97.79  |
| <b>131</b>                                                   | E83 Disorders of mineral metabolism                                                      | 3 | 12.30 | 0.001 | 142   | 23.67  | 102.79 |
| <b>141</b>                                                   | E86 Volume depletion                                                                     | 3 | 11.31 | 0.002 | 106   | 17.67  | 115.05 |
| <b>145</b>                                                   | E86.0 Dehydration                                                                        | 4 | 11.10 | 0.005 | 99    | 16.50  | 118.18 |
| <b>151</b>                                                   | E50-E64 Other nutritional deficiencies                                                   | 2 | 10.67 | 0.009 | 137   | 22.83  | 97.11  |
| <b>F00-F99 Mental and behavioural disorders</b>              |                                                                                          |   |       |       |       |        |        |
| <b>28</b>                                                    | F00-F99 Mental and behavioural disorders                                                 | 1 | 68.24 | 0.001 | 1,776 | 296.00 | 66.55  |
| <b>52</b>                                                    | F40-F48 Neurotic, stress-related and somatoform disorders                                | 2 | 39.33 | 0.001 | 543   | 90.50  | 93.37  |
| <b>88</b>                                                    | F41.9 Anxiety disorder, unspecified                                                      | 4 | 19.15 | 0.001 | 194   | 32.33  | 110.33 |
| <b>89</b>                                                    | F41 Other anxiety disorders                                                              | 3 | 19.05 | 0.001 | 264   | 44.00  | 93.18  |
| <b>90</b>                                                    | F80-F89 Disorders of psychological development                                           | 2 | 18.82 | 0.001 | 422   | 70.33  | 72.05  |
| <b>144</b>                                                   | F00-F09 Organic, including symptomatic,                                                  | 2 | 11.11 | 0.004 | 35    | 5.83   | 208.75 |

|                                               | mental disorders                                            |   |        |       |       |        |        |
|-----------------------------------------------|-------------------------------------------------------------|---|--------|-------|-------|--------|--------|
| <b>G00-G99 Diseases of the nervous system</b> |                                                             |   |        |       |       |        |        |
| <b>15</b>                                     | G00-G99 Diseases of the nervous system                      | 1 | 155.02 | 0.001 | 2,238 | 373.00 | 91.15  |
| <b>29</b>                                     | G89-G99 Other disorders of the nervous system               | 2 | 66.03  | 0.001 | 519   | 86.50  | 126.59 |
| <b>32</b>                                     | G40-G47 Episodic and paroxysmal disorders                   | 2 | 59.22  | 0.001 | 1,365 | 227.50 | 70.99  |
| <b>46</b>                                     | G89.29 Other chronic pain                                   | 5 | 40.51  | 0.001 | 201   | 33.50  | 162.69 |
| <b>48</b>                                     | G89.2 Chronic pain, not elsewhere classified                | 4 | 40.12  | 0.001 | 202   | 33.67  | 161.36 |
| <b>50</b>                                     | G89 Pain, not elsewhere classified                          | 3 | 39.59  | 0.001 | 268   | 44.67  | 137.30 |
| <b>54</b>                                     | G00-G09 Inflammatory diseases of the central nervous system | 2 | 36.23  | 0.001 | 61    | 10.17  | 293.31 |
| <b>57</b>                                     | G43 Migraine                                                | 3 | 32.23  | 0.001 | 301   | 50.17  | 115.27 |
| <b>64</b>                                     | G04 Encephalitis, myelitis and encephalomyelitis            | 3 | 25.52  | 0.001 | 40    | 6.67   | 304.80 |
| <b>68</b>                                     | G47 Sleep disorders                                         | 3 | 24.39  | 0.001 | 481   | 80.17  | 77.12  |
| <b>69</b>                                     | G43.0 Migraine without aura                                 | 4 | 23.67  | 0.001 | 116   | 19.33  | 163.84 |
| <b>71</b>                                     | G44 Other headache syndromes                                | 3 | 23.21  | 0.001 | 87    | 14.50  | 189.66 |
| <b>74</b>                                     | G44.5 Complicated headache syndromes                        | 4 | 22.55  | 0.001 | 22    | 3.67   | 390.46 |
| <b>77</b>                                     | G90.9 Disorder of the autonomic nervous system, unspecified | 4 | 20.93  | 0.001 | 19    | 3.17   | 404.73 |
| <b>79</b>                                     | G90 Disorders of autonomic nervous system                   | 3 | 20.55  | 0.001 | 38    | 6.33   | 279.15 |
| <b>82</b>                                     | G04.8 Other encephalitis, myelitis and encephalomyelitis    | 4 | 19.85  | 0.001 | 24    | 4.00   | 350.00 |
| <b>86</b>                                     | G44.52 New daily persistent headache (NDPH)                 | 5 | 19.31  | 0.001 | 18    | 3.00   | 400.00 |
| <b>94</b>                                     | G93.3 Postviral fatigue syndrome                            | 4 | 18.16  | 0.001 | 13    | 2.17   | 453.00 |
| <b>111</b>                                    | G43.009 Migraine                                            | 6 | 15.37  | 0.001 | 55    | 9.17   | 194.44 |

|                                                   |                                                                 |   |       |       |       |        |        |
|---------------------------------------------------|-----------------------------------------------------------------|---|-------|-------|-------|--------|--------|
|                                                   | without aura, not intractable, without status migrainosus       |   |       |       |       |        |        |
| <b>114</b>                                        | G93 Other disorders of brain                                    | 3 | 15.25 | 0.001 | 174   | 29.00  | 103.45 |
| <b>118</b>                                        | G43.00 Migraine without aura, not intractable                   | 5 | 14.26 | 0.001 | 64    | 10.67  | 171.79 |
| <b>133</b>                                        | G04.81 Other encephalitis and encephalomyelitis                 | 5 | 12.11 | 0.001 | 17    | 2.83   | 324.03 |
| <b>166</b>                                        | G47.9 Sleep disorder, unspecified                               | 4 | 9.47  | 0.023 | 74    | 12.33  | 127.09 |
| <b>167</b>                                        | G43.01 Migraine without aura, intractable                       | 5 | 9.46  | 0.023 | 52    | 8.67   | 153.75 |
| <b>100-I99 Diseases of the circulatory system</b> |                                                                 |   |       |       |       |        |        |
| <b>35</b>                                         | I00-I99 Diseases of the circulatory system                      | 1 | 53.46 | 0.001 | 948   | 158.00 | 81.65  |
| <b>41</b>                                         | I30-I52 Other forms of heart disease                            | 2 | 45.42 | 0.001 | 335   | 55.83  | 131.06 |
| <b>87</b>                                         | I49 Other cardiac arrhythmias                                   | 3 | 19.26 | 0.001 | 51    | 8.50   | 229.41 |
| <b>122</b>                                        | I49.8 Other specified cardiac arrhythmias                       | 4 | 13.45 | 0.001 | 34    | 5.67   | 235.10 |
| <b>132</b>                                        | I51 Complications and ill-defined descriptions of heart disease | 3 | 12.12 | 0.001 | 59    | 9.83   | 164.50 |
| <b>J00-J99 Diseases of the respiratory system</b> |                                                                 |   |       |       |       |        |        |
| <b>18</b>                                         | J00-J99 Diseases of the respiratory system                      | 1 | 99.31 | 0.001 | 2,514 | 419.00 | 67.54  |
| <b>45</b>                                         | J40-J47 Chronic lower respiratory diseases                      | 2 | 42.07 | 0.001 | 669   | 111.50 | 86.55  |
| <b>47</b>                                         | J45 Asthma                                                      | 3 | 40.37 | 0.001 | 648   | 108.00 | 86.11  |
| <b>70</b>                                         | J30-J39 Other diseases of upper respiratory tract               | 2 | 23.64 | 0.001 | 459   | 76.50  | 77.78  |
| <b>75</b>                                         | J45.9 Other and unspecified asthma                              | 4 | 21.90 | 0.001 | 203   | 33.83  | 115.78 |
| <b>80</b>                                         | J96-J99 Other diseases of the respiratory system                | 2 | 20.15 | 0.001 | 374   | 62.33  | 79.69  |
| <b>109</b>                                        | J35 Chronic diseases of tonsils and adenoids                    | 3 | 15.52 | 0.001 | 78    | 13.00  | 161.54 |
| <b>115</b>                                        | J45.909 Unspecified asthma, uncomplicated                       | 6 | 14.48 | 0.001 | 153   | 25.50  | 107.84 |
| <b>121</b>                                        | J45.90 Unspecified                                              | 5 | 13.60 | 0.001 | 169   | 28.17  | 98.79  |

|                                                                             |                                                                           |   |        |       |       |        |        |
|-----------------------------------------------------------------------------|---------------------------------------------------------------------------|---|--------|-------|-------|--------|--------|
|                                                                             | asthma                                                                    |   |        |       |       |        |        |
| 123                                                                         | J96.0 Acute respiratory failure                                           | 4 | 13.36  | 0.001 | 95    | 15.83  | 133.73 |
| 125                                                                         | J12.8 Other viral pneumonia                                               | 4 | 12.87  | 0.001 | 32    | 5.33   | 237.71 |
| 129                                                                         | J45.4 Moderate persistent asthma                                          | 4 | 12.36  | 0.001 | 106   | 17.67  | 120.71 |
| 143                                                                         | J03 Acute tonsillitis                                                     | 3 | 11.17  | 0.004 | 26    | 4.33   | 246.42 |
| 147                                                                         | J45.40 Moderate persistent asthma, uncomplicated                          | 5 | 11.00  | 0.005 | 84    | 14.00  | 128.57 |
| 150                                                                         | J80-J84 Other respiratory diseases principally affecting the interstitium | 2 | 10.67  | 0.009 | 39    | 6.50   | 192.31 |
| 152                                                                         | J96.01 Acute respiratory failure with hypoxia                             | 5 | 10.63  | 0.009 | 49    | 8.17   | 169.28 |
| 153                                                                         | J98 Other respiratory disorders                                           | 3 | 10.57  | 0.010 | 150   | 25.00  | 92.00  |
| 154                                                                         | J20-J22 Other acute lower respiratory infections                          | 2 | 10.47  | 0.011 | 46    | 7.67   | 173.79 |
| 157                                                                         | J96 Respiratory failure, not elsewhere classified                         | 3 | 10.30  | 0.012 | 221   | 36.83  | 73.77  |
| 159                                                                         | J45.99 Other asthma                                                       | 5 | 9.99   | 0.014 | 34    | 5.67   | 199.82 |
| 165                                                                         | J12 Viral pneumonia, not elsewhere classified                             | 3 | 9.48   | 0.023 | 45    | 7.50   | 166.67 |
| <b>K00-K93 Diseases of the digestive system</b>                             |                                                                           |   |        |       |       |        |        |
| 135                                                                         | K00-K93 Diseases of the digestive system                                  | 1 | 11.86  | 0.001 | 1,776 | 296.00 | 26.69  |
| 137                                                                         | K20-K31 Diseases of oesophagus, stomach and duodenum                      | 2 | 11.40  | 0.002 | 318   | 53.00  | 64.15  |
| <b>L00-L99 Diseases of the skin and subcutaneous tissue</b>                 |                                                                           |   |        |       |       |        |        |
| 127                                                                         | L00-L99 Diseases of the skin and subcutaneous tissue                      | 1 | 12.67  | 0.001 | 815   | 135.83 | 41.35  |
| <b>M00-M99 Diseases of the musculoskeletal system and connective tissue</b> |                                                                           |   |        |       |       |        |        |
| 13                                                                          | M00-M99 Diseases of the musculoskeletal system and connective tissue      | 1 | 170.35 | 0.001 | 2,580 | 430.00 | 88.84  |
| 25                                                                          | M20-M25 Other joint                                                       | 2 | 68.87  | 0.001 | 837   | 139.50 | 100.00 |

|            |                                                                           |   |       |       |     |       |        |
|------------|---------------------------------------------------------------------------|---|-------|-------|-----|-------|--------|
|            | disorders                                                                 |   |       |       |     |       |        |
| <b>31</b>  | M25 Other joint disorder, not elsewhere classified                        | 3 | 59.85 | 0.001 | 545 | 90.83 | 116.89 |
| <b>34</b>  | M79 Other and unspecified soft tissue disorders, not elsewhere classified | 3 | 53.49 | 0.001 | 365 | 60.83 | 136.73 |
| <b>37</b>  | M70-M79 Other soft tissue disorders                                       | 2 | 50.12 | 0.001 | 391 | 65.17 | 127.10 |
| <b>39</b>  | M25.5 Pain in joint                                                       | 4 | 46.27 | 0.001 | 393 | 65.50 | 121.37 |
| <b>43</b>  | M79.1 Myalgia                                                             | 4 | 42.95 | 0.001 | 87  | 14.50 | 265.52 |
| <b>66</b>  | M25.50 Pain in unspecified joint                                          | 5 | 25.07 | 0.001 | 38  | 6.33  | 310.74 |
| <b>67</b>  | M79.10 Myalgia, unspecified site                                          | 5 | 24.76 | 0.001 | 46  | 7.67  | 278.10 |
| <b>81</b>  | M02.30 Reiter's disease, unspecified site                                 | 5 | 19.87 | 0.001 | 14  | 2.33  | 457.94 |
| <b>84</b>  | M30-M36 Systemic connective tissue disorders                              | 2 | 19.49 | 0.001 | 82  | 13.67 | 177.98 |
| <b>85</b>  | M02.3 Reiter's disease                                                    | 4 | 19.42 | 0.001 | 16  | 2.67  | 424.34 |
| <b>92</b>  | M79.18 Myalgia, other site                                                | 5 | 18.28 | 0.001 | 41  | 6.83  | 251.39 |
| <b>93</b>  | M35 Other systemic involvement of connective tissue                       | 3 | 18.18 | 0.001 | 33  | 5.50  | 281.82 |
| <b>96</b>  | M35.7 Hypermobility syndrome                                              | 4 | 18.05 | 0.001 | 21  | 3.50  | 357.14 |
| <b>98</b>  | M02 Postinfective and reactive arthropathies                              | 3 | 17.71 | 0.001 | 17  | 2.83  | 394.70 |
| <b>101</b> | M00-M02 Infectious arthropathies                                          | 2 | 17.25 | 0.001 | 24  | 4.00  | 325.00 |
| <b>103</b> | M79.6 Pain in limb, hand, foot, fingers and toes                          | 4 | 16.64 | 0.001 | 238 | 39.67 | 91.58  |
| <b>104</b> | M60-M63 Disorders of muscles                                              | 2 | 16.55 | 0.001 | 316 | 52.67 | 78.47  |
| <b>106</b> | M86-M90 Other osteopathies                                                | 2 | 15.80 | 0.001 | 117 | 19.50 | 130.77 |
| <b>107</b> | M62 Other disorders of muscle                                             | 3 | 15.74 | 0.001 | 312 | 52.00 | 76.92  |
| <b>128</b> | M62.8 Other specified                                                     | 4 | 12.60 | 0.001 | 278 | 46.33 | 72.67  |

|                                                                                                        |                                                                                                 |   |        |       |       |          |        |
|--------------------------------------------------------------------------------------------------------|-------------------------------------------------------------------------------------------------|---|--------|-------|-------|----------|--------|
|                                                                                                        | disorders of muscle                                                                             |   |        |       |       |          |        |
| 138                                                                                                    | M89.1 Physeal arrest                                                                            | 4 | 11.38  | 0.002 | 9     | 1.50     | 433.33 |
| 140                                                                                                    | M89 Other disorders of bone                                                                     | 3 | 11.37  | 0.002 | 44    | 7.33     | 186.49 |
| 146                                                                                                    | M79.60 Pain in limb, unspecified                                                                | 5 | 11.10  | 0.005 | 99    | 16.50    | 118.18 |
| 156                                                                                                    | M50-M54 Other dorsopathies                                                                      | 2 | 10.37  | 0.012 | 243   | 40.50    | 70.37  |
| 170                                                                                                    | M25.57 Pain in ankle and joints of foot                                                         | 5 | 9.10   | 0.024 | 53    | 8.83     | 149.15 |
| 172                                                                                                    | M54 Dorsalgia                                                                                   | 3 | 9.00   | 0.025 | 225   | 37.50    | 68.00  |
| <b>R00-R99 Symptoms, signs and abnormal clinical and laboratory findings, not elsewhere classified</b> |                                                                                                 |   |        |       |       |          |        |
| 1                                                                                                      | R00-R99 Symptoms, signs and abnormal clinical and laboratory findings, not elsewhere classified | 1 | 696.14 | 0.001 | 7,440 | 1,240.00 | 107.18 |
| 9                                                                                                      | R00-R09 Symptoms and signs involving the circulatory and respiratory systems                    | 2 | 315.26 | 0.001 | 1,768 | 294.67   | 152.15 |
| 10                                                                                                     | R06.0 Dyspnea                                                                                   | 4 | 205.81 | 0.001 | 282   | 47.00    | 327.66 |
| 11                                                                                                     | R50-R69 General symptoms and signs                                                              | 2 | 187.76 | 0.001 | 1,975 | 329.17   | 108.10 |
| 12                                                                                                     | R06 Abnormalities of breathing                                                                  | 3 | 172.25 | 0.001 | 564   | 94.00    | 204.26 |
| 16                                                                                                     | R53 Malaise and fatigue                                                                         | 3 | 130.02 | 0.001 | 380   | 63.33    | 217.39 |
| 17                                                                                                     | R53.8 Other malaise and fatigue                                                                 | 4 | 116.09 | 0.001 | 311   | 51.83    | 228.00 |
| 19                                                                                                     | R06.00 Dyspnea, unspecified                                                                     | 5 | 91.08  | 0.001 | 100   | 16.67    | 367.91 |
| 20                                                                                                     | R06.02 Shortness of breath                                                                      | 5 | 85.46  | 0.001 | 116   | 19.33    | 329.38 |
| 21                                                                                                     | R53.83 Other fatigue                                                                            | 5 | 80.62  | 0.001 | 207   | 34.50    | 233.33 |
| 22                                                                                                     | R40-R46 Symptoms and signs involving cognition, perception, emotional state and behaviour       | 2 | 77.91  | 0.001 | 665   | 110.83   | 121.06 |
| 23                                                                                                     | R10-R19 Symptoms and signs involving the digestive system and abdomen                           | 2 | 71.22  | 0.001 | 1,508 | 251.33   | 74.27  |

|           |                                                                                |   |       |       |     |       |        |
|-----------|--------------------------------------------------------------------------------|---|-------|-------|-----|-------|--------|
| <b>24</b> | R07 Pain in throat and chest                                                   | 3 | 69.87 | 0.001 | 280 | 46.67 | 182.84 |
| <b>36</b> | R42 Dizziness and giddiness                                                    | 3 | 51.34 | 0.001 | 137 | 22.83 | 228.52 |
| <b>38</b> | R07.9 Chest pain, unspecified                                                  | 4 | 46.88 | 0.001 | 154 | 25.67 | 203.86 |
| <b>40</b> | R06.09 Other forms of dyspnea                                                  | 5 | 45.94 | 0.001 | 34  | 5.67  | 446.74 |
| <b>42</b> | R25-R29 Symptoms and signs involving the nervous and musculoskeletal systems   | 2 | 44.32 | 0.001 | 272 | 45.33 | 144.87 |
| <b>44</b> | R00 Abnormalities of heart beat                                                | 3 | 42.38 | 0.001 | 217 | 36.17 | 159.88 |
| <b>53</b> | R51 Headache                                                                   | 3 | 36.56 | 0.001 | 208 | 34.67 | 150.94 |
| <b>55</b> | R51.9 Headache, unspecified                                                    | 4 | 35.57 | 0.001 | 193 | 32.17 | 154.90 |
| <b>59</b> | R10 Abdominal and pelvic pain                                                  | 3 | 31.59 | 0.001 | 523 | 87.17 | 84.70  |
| <b>60</b> | R00.2 Palpitations                                                             | 4 | 30.93 | 0.001 | 82  | 13.67 | 229.19 |
| <b>61</b> | R05 Cough                                                                      | 3 | 29.56 | 0.001 | 348 | 58.00 | 101.72 |
| <b>62</b> | R53.82 Chronic fatigue, unspecified                                            | 5 | 27.98 | 0.001 | 33  | 5.50  | 354.55 |
| <b>63</b> | R07.89 Other chest pain                                                        | 5 | 25.79 | 0.001 | 85  | 14.17 | 203.46 |
| <b>65</b> | R07.8 Other chest pain                                                         | 4 | 25.20 | 0.001 | 99  | 16.50 | 184.85 |
| <b>73</b> | R29 Other symptoms and signs involving the nervous and musculoskeletal systems | 3 | 22.64 | 0.001 | 151 | 25.17 | 138.38 |
| <b>76</b> | R05.3 Chronic cough                                                            | 4 | 21.81 | 0.001 | 34  | 5.67  | 305.64 |
| <b>78</b> | R68 Other general symptoms and signs                                           | 3 | 20.62 | 0.001 | 110 | 18.33 | 156.41 |
| <b>83</b> | R43 Disturbances of smell and taste                                            | 3 | 19.53 | 0.001 | 34  | 5.67  | 288.01 |
| <b>91</b> | R70-R79 Abnormal findings on examination of blood, without diagnosis           | 2 | 18.64 | 0.001 | 300 | 50.00 | 86.00  |
| <b>95</b> | R11 Nausea and vomiting                                                        | 3 | 18.05 | 0.001 | 427 | 71.17 | 70.02  |
| <b>97</b> | R90-R96 Abnormal findings on diagnostic imaging and in function                | 2 | 17.75 | 0.001 | 279 | 46.50 | 87.10  |



|            |                                                                               |   |       |       |     |       |        |
|------------|-------------------------------------------------------------------------------|---|-------|-------|-----|-------|--------|
|            | studies, without diagnosis                                                    |   |       |       |     |       |        |
| <b>99</b>  | R68.89 Other general symptoms and signs                                       | 5 | 17.64 | 0.001 | 83  | 13.83 | 167.53 |
| <b>100</b> | R55 Syncope and collapse                                                      | 3 | 17.32 | 0.001 | 77  | 12.83 | 172.80 |
| <b>102</b> | R68.8 Other general symptoms and signs                                        | 4 | 16.84 | 0.001 | 92  | 15.33 | 154.40 |
| <b>105</b> | R43.9 Unspecified disturbances of smell and taste                             | 4 | 16.12 | 0.001 | 16  | 2.67  | 386.89 |
| <b>108</b> | R41 Other symptoms and signs involving cognitive functions and awareness      | 3 | 15.58 | 0.001 | 133 | 22.17 | 121.02 |
| <b>110</b> | R53.1 Weakness                                                                | 4 | 15.42 | 0.001 | 68  | 11.33 | 173.61 |
| <b>116</b> | R00.0 Tachycardia, unspecified                                                | 4 | 14.44 | 0.001 | 99  | 16.50 | 136.36 |
| <b>124</b> | R10.84 Generalized abdominal pain                                             | 5 | 13.03 | 0.001 | 147 | 24.50 | 104.08 |
| <b>126</b> | R53.81 Other malaise                                                          | 5 | 12.87 | 0.001 | 71  | 11.83 | 153.59 |
| <b>130</b> | R27 Other lack of coordination                                                | 3 | 12.34 | 0.001 | 42  | 7.00  | 200.00 |
| <b>134</b> | R10.8 Other abdominal pain                                                    | 4 | 11.97 | 0.001 | 160 | 26.67 | 94.98  |
| <b>136</b> | R09 Other symptoms and signs involving the circulatory and respiratory system | 3 | 11.60 | 0.001 | 271 | 45.17 | 70.47  |
| <b>155</b> | R05.9 Cough, unspecified                                                      | 4 | 10.38 | 0.012 | 194 | 32.33 | 79.40  |
| <b>160</b> | R11.10 Vomiting, unspecified                                                  | 5 | 9.94  | 0.015 | 201 | 33.50 | 76.12  |
| <b>161</b> | R46.81 Obsessive-compulsive behavior                                          | 5 | 9.71  | 0.020 | 8   | 1.33  | 426.32 |
| <b>162</b> | R29.90 Unspecified symptoms and signs involving the nervous system            | 5 | 9.69  | 0.023 | 10  | 1.67  | 379.04 |
| <b>163</b> | R13 Aphagia and dysphagia                                                     | 3 | 9.54  | 0.023 | 267 | 44.50 | 64.04  |
| <b>164</b> | R13.1 Dysphagia                                                               | 4 | 9.54  | 0.023 | 267 | 44.50 | 64.04  |
| <b>168</b> | R59.1 Generalized                                                             | 4 | 9.28  | 0.023 | 15  | 2.50  | 300.00 |

|                                                                                   |                                                                                       |   |        |       |       |        |        |
|-----------------------------------------------------------------------------------|---------------------------------------------------------------------------------------|---|--------|-------|-------|--------|--------|
|                                                                                   | enlarged lymph nodes                                                                  |   |        |       |       |        |        |
| <b>169</b>                                                                        | R06.8 Other abnormalities of breathing                                                | 4 | 9.15   | 0.024 | 224   | 37.33  | 68.77  |
| <b>171</b>                                                                        | R41.8 Other symptoms and signs involving cognitive functions and awareness            | 4 | 9.09   | 0.024 | 99    | 16.50  | 106.06 |
| <b>U00-U95 Codes for special purposes</b>                                         |                                                                                       |   |        |       |       |        |        |
| <b>2</b>                                                                          | U09 Post COVID-19 condition                                                           | 3 | 492.73 | 0.001 | 275   | 45.83  | 500.04 |
| <b>3</b>                                                                          | U09.9 Post COVID-19 condition, unspecified                                            | 4 | 492.73 | 0.001 | 275   | 45.83  | 500.04 |
| <b>4</b>                                                                          | U00-U95 Codes for special purposes                                                    | 1 | 408.47 | 0.001 | 630   | 105.00 | 307.62 |
| <b>5</b>                                                                          | U00-U49 Provisional assignment of new diseases of uncertain etiology or emergency use | 2 | 408.47 | 0.001 | 630   | 105.00 | 307.62 |
| <b>26</b>                                                                         | U07.1 Emergency use of U07.1   COVID-19                                               | 4 | 68.29  | 0.001 | 355   | 59.17  | 158.58 |
| <b>27</b>                                                                         | U07                                                                                   | 3 | 68.29  | 0.001 | 355   | 59.17  | 158.58 |
| <b>Z00-Z99 Factors influencing health status and contact with health services</b> |                                                                                       |   |        |       |       |        |        |
| <b>117</b>                                                                        | Z00-Z99 Factors influencing health status and contact with health services            | 1 | 14.42  | 0.001 | 1,774 | 295.67 | 29.54  |
| <b>120</b>                                                                        | Z69-Z76 Persons encountering health services in other circumstances                   | 2 | 13.64  | 0.001 | 254   | 42.33  | 79.54  |

Table 2b: PASC vs COVID negative comparison TreeScan results

| Cut | Node | Tree Level | Log Likelihood | P value | N cases observed | N cases expected | Percent excess |
|-----|------|------------|----------------|---------|------------------|------------------|----------------|
|-----|------|------------|----------------|---------|------------------|------------------|----------------|

|                                                                                                                    |                                                                                            | Ratio |        |       |     |        | cases  |
|--------------------------------------------------------------------------------------------------------------------|--------------------------------------------------------------------------------------------|-------|--------|-------|-----|--------|--------|
| <b>A00-B99 Certain infections and parasitic diseases</b>                                                           |                                                                                            |       |        |       |     |        |        |
| <b>7</b>                                                                                                           | B90-B94 Sequelae of infectious and parasitic diseases                                      | 2     | 327.89 | 0.001 | 183 | 30.50  | 500.00 |
| <b>8</b>                                                                                                           | B94 Sequelae of other and unspecified infectious and parasitic diseases                    | 3     | 327.89 | 0.001 | 183 | 30.50  | 500.00 |
| <b>9</b>                                                                                                           | B94.8 Sequelae of other specified infectious and parasitic diseases                        | 4     | 326.10 | 0.001 | 182 | 30.33  | 500.07 |
| <b>14</b>                                                                                                          | A00-B99 Certain infections and parasitic diseases                                          | 1     | 245.33 | 0.001 | 796 | 132.67 | 205.27 |
| <b>75</b>                                                                                                          | B95-B98 Bacterial, viral and other infectious agents                                       | 2     | 31.80  | 0.001 | 175 | 29.17  | 153.69 |
| <b>94</b>                                                                                                          | B97 Viral agents as the cause of diseases classified elsewhere                             | 3     | 26.25  | 0.001 | 78  | 13.00  | 215.38 |
| <b>117</b>                                                                                                         | B25-B34 Other viral diseases                                                               | 2     | 22.14  | 0.001 | 160 | 26.67  | 132.47 |
| <b>177</b>                                                                                                         | A30-A49 Other bacterial diseases                                                           | 2     | 14.78  | 0.001 | 53  | 8.83   | 194.45 |
| <b>203</b>                                                                                                         | A65-A69 Other spirochaetal diseases                                                        | 2     | 12.98  | 0.001 | 14  | 2.33   | 372.10 |
| <b>207</b>                                                                                                         | B97.89 Other viral agents as the cause of diseases classified elsewhere                    | 5     | 12.54  | 0.002 | 48  | 8.00   | 187.50 |
| <b>216</b>                                                                                                         | B34 Viral infection of unspecified site                                                    | 3     | 12.28  | 0.002 | 122 | 20.33  | 111.51 |
| <b>220</b>                                                                                                         | B97.8 Other viral agents as the cause of diseases classified elsewhere                     | 4     | 12.08  | 0.002 | 49  | 8.17   | 181.52 |
| <b>232</b>                                                                                                         | B25 Cytomegaloviral disease                                                                | 3     | 11.38  | 0.002 | 9   | 1.50   | 433.33 |
| <b>D50-D89 Diseases of the blood and blood-forming organs and certain disorders involving the immune mechanism</b> |                                                                                            |       |        |       |     |        |        |
| <b>23</b>                                                                                                          | D50-D89 Diseases of the blood and blood-forming organs and certain disorders involving the | 1     | 124.54 | 0.001 | 575 | 95.83  | 169.23 |

|                                                              |                                                                                           |   |        |       |       |        |        |
|--------------------------------------------------------------|-------------------------------------------------------------------------------------------|---|--------|-------|-------|--------|--------|
|                                                              | immune mechanism                                                                          |   |        |       |       |        |        |
| <b>40</b>                                                    | D89.89 Other specified disorders involving the immune mechanism, not elsewhere classified | 5 | 59.62  | 0.001 | 42    | 7.00   | 457.14 |
| <b>51</b>                                                    | D80-D89 Certain disorders involving the immune mechanism                                  | 2 | 51.91  | 0.001 | 198   | 33.00  | 187.88 |
| <b>66</b>                                                    | D89 Other disorders involving the immune mechanism, not elsewhere classified              | 3 | 41.12  | 0.001 | 84    | 14.00  | 264.29 |
| <b>67</b>                                                    | D89.8 Other specified disorders involving the immune mechanism, not elsewhere classified  | 4 | 40.07  | 0.001 | 72    | 12.00  | 283.33 |
| <b>102</b>                                                   | D60-D64 Aplastic and other anaemias                                                       | 2 | 24.97  | 0.001 | 130   | 21.67  | 158.42 |
| <b>146</b>                                                   | D65-D69 Coagulation defects, purpura and other haemorrhagic conditions                    | 2 | 17.60  | 0.001 | 73    | 12.17  | 179.38 |
| <b>157</b>                                                   | D55-D59 Haemolytic anaemias                                                               | 2 | 16.08  | 0.001 | 33    | 5.50   | 263.64 |
| <b>161</b>                                                   | D64 Other anemias                                                                         | 3 | 15.91  | 0.001 | 77    | 12.83  | 165.00 |
| <b>166</b>                                                   | D70-D77 Other diseases of blood and blood-forming organs                                  | 2 | 15.70  | 0.001 | 81    | 13.50  | 159.26 |
| <b>184</b>                                                   | D57 Sickle-cell disorders                                                                 | 3 | 14.39  | 0.001 | 22    | 3.67   | 308.72 |
| <b>202</b>                                                   | D69 Purpura and other hemorrhagic conditions                                              | 3 | 13.02  | 0.001 | 47    | 7.83   | 193.74 |
| <b>214</b>                                                   | D64.9 Anemia, unspecified                                                                 | 4 | 12.30  | 0.002 | 62    | 10.33  | 161.37 |
| <b>249</b>                                                   | D57.4 Sickle-cell thalassemia                                                             | 4 | 10.75  | 0.005 | 6     | 1.00   | 500.00 |
| <b>255</b>                                                   | D84 Other immunodeficiencies                                                              | 3 | 10.35  | 0.005 | 94    | 15.67  | 116.98 |
| <b>E00-E90 Endocrine, nutritional and metabolic diseases</b> |                                                                                           |   |        |       |       |        |        |
| <b>25</b>                                                    | E00-E90 Endocrine, nutritional and metabolic diseases                                     | 1 | 113.64 | 0.001 | 1,205 | 200.83 | 107.64 |
| <b>37</b>                                                    | E70-E88 Metabolic disorders                                                               | 2 | 72.43  | 0.001 | 498   | 83.00  | 136.14 |

|                                                 |                                                                                                       |   |        |       |       |        |        |
|-------------------------------------------------|-------------------------------------------------------------------------------------------------------|---|--------|-------|-------|--------|--------|
| <b>62</b>                                       | E87 Other disorders of fluid, electrolyte and acid-base balance                                       | 3 | 43.15  | 0.001 | 118   | 19.67  | 225.37 |
| <b>105</b>                                      | E86 Volume depletion                                                                                  | 3 | 24.49  | 0.001 | 72    | 12.00  | 216.67 |
| <b>114</b>                                      | E86.0 Dehydration                                                                                     | 4 | 22.76  | 0.001 | 69    | 11.50  | 213.04 |
| <b>139</b>                                      | E65-E68 Obesity and other hyperalimentation                                                           | 2 | 18.20  | 0.001 | 170   | 28.33  | 115.32 |
| <b>148</b>                                      | E66 Overweight and obesity                                                                            | 3 | 17.20  | 0.001 | 166   | 27.67  | 113.23 |
| <b>181</b>                                      | E83 Disorders of mineral metabolism                                                                   | 3 | 14.53  | 0.001 | 133   | 22.17  | 116.51 |
| <b>222</b>                                      | E50-E64 Other nutritional deficiencies                                                                | 2 | 11.80  | 0.002 | 132   | 22.00  | 104.55 |
| <b>223</b>                                      | E66.9 Obesity, unspecified                                                                            | 4 | 11.75  | 0.002 | 67    | 11.17  | 150.67 |
| <b>244</b>                                      | E87.7 Fluid overload                                                                                  | 4 | 11.08  | 0.002 | 32    | 5.33   | 218.95 |
| <b>254</b>                                      | E87.70 Fluid overload, unspecified                                                                    | 5 | 10.49  | 0.005 | 30    | 5.00   | 220.00 |
| <b>F00-F99 Mental and behavioural disorders</b> |                                                                                                       |   |        |       |       |        |        |
| <b>26</b>                                       | F00-F99 Mental and behavioural disorders                                                              | 1 | 107.08 | 0.001 | 1,548 | 258.00 | 91.09  |
| <b>48</b>                                       | F40-F48 Neurotic, stress-related and somatoform disorders                                             | 2 | 53.47  | 0.001 | 483   | 80.50  | 117.39 |
| <b>87</b>                                       | F41 Other anxiety disorders                                                                           | 3 | 27.79  | 0.001 | 228   | 38.00  | 123.68 |
| <b>88</b>                                       | F41.9 Anxiety disorder, unspecified                                                                   | 4 | 27.37  | 0.001 | 166   | 27.67  | 145.75 |
| <b>91</b>                                       | F80-F89 Disorders of psychological development                                                        | 2 | 26.88  | 0.001 | 377   | 62.83  | 92.58  |
| <b>182</b>                                      | F44 Dissociative and conversion disorders                                                             | 3 | 14.49  | 0.001 | 13    | 2.17   | 406.91 |
| <b>217</b>                                      | F00-F09 Organic, including symptomatic, mental disorders                                              | 2 | 12.25  | 0.002 | 33    | 5.50   | 227.27 |
| <b>221</b>                                      | F90-F98 Behavioural and emotional disorders with onset usually occurring in childhood and adolescence | 2 | 11.80  | 0.002 | 165   | 27.50  | 92.73  |
| <b>256</b>                                      | F88 Other disorders of psychological                                                                  | 3 | 10.28  | 0.005 | 143   | 23.83  | 93.03  |

|                                               |                                                             |   |        |       |       |        |        |
|-----------------------------------------------|-------------------------------------------------------------|---|--------|-------|-------|--------|--------|
|                                               | development                                                 |   |        |       |       |        |        |
| <b>262</b>                                    | F42 Obsessive-compulsive disorder                           | 3 | 10.05  | 0.007 | 22    | 3.67   | 254.22 |
| <b>G00-G99 Diseases of the nervous system</b> |                                                             |   |        |       |       |        |        |
| <b>16</b>                                     | G00-G99 Diseases of the nervous system                      | 1 | 226.27 | 0.001 | 1,937 | 322.83 | 120.86 |
| <b>31</b>                                     | G40-G47 Episodic and paroxysmal disorders                   | 2 | 93.82  | 0.001 | 1,177 | 196.17 | 98.30  |
| <b>33</b>                                     | G89-G99 Other disorders of the nervous system               | 2 | 81.51  | 0.001 | 471   | 78.50  | 149.68 |
| <b>44</b>                                     | G43 Migraine                                                | 3 | 58.59  | 0.001 | 226   | 37.67  | 186.70 |
| <b>54</b>                                     | G89 Pain, not elsewhere classified                          | 3 | 49.64  | 0.001 | 240   | 40.00  | 165.00 |
| <b>55</b>                                     | G00-G09 Inflammatory diseases of the central nervous system | 2 | 48.47  | 0.001 | 50    | 8.33   | 380.19 |
| <b>58</b>                                     | G89.29 Other chronic pain                                   | 5 | 45.09  | 0.001 | 190   | 31.67  | 177.87 |
| <b>59</b>                                     | G89.2 Chronic pain, not elsewhere classified                | 4 | 44.65  | 0.001 | 191   | 31.83  | 176.47 |
| <b>71</b>                                     | G44 Other headache syndromes                                | 3 | 33.99  | 0.001 | 69    | 11.50  | 265.22 |
| <b>72</b>                                     | G04 Encephalitis, myelitis and encephalomyelitis            | 3 | 33.82  | 0.001 | 33    | 5.50   | 390.91 |
| <b>80</b>                                     | G47 Sleep disorders                                         | 3 | 30.02  | 0.001 | 450   | 75.00  | 89.33  |
| <b>81</b>                                     | G43.0 Migraine without aura                                 | 4 | 29.98  | 0.001 | 102   | 17.00  | 200.00 |
| <b>93</b>                                     | G90 Disorders of autonomic nervous system                   | 3 | 26.47  | 0.001 | 32    | 5.33   | 350.28 |
| <b>107</b>                                    | G44.5 Complicated headache syndromes                        | 4 | 24.19  | 0.001 | 21    | 3.50   | 414.29 |
| <b>116</b>                                    | G04.8 Other encephalitis, myelitis and encephalomyelitis    | 4 | 22.55  | 0.001 | 22    | 3.67   | 390.46 |
| <b>120</b>                                    | G93.3 Postviral fatigue syndrome                            | 4 | 21.50  | 0.001 | 12    | 2.00   | 500.00 |
| <b>132</b>                                    | G44.52 New daily persistent headache (NDPH)                 | 5 | 19.31  | 0.001 | 18    | 3.00   | 400.00 |
| <b>138</b>                                    | G93 Other disorders of brain                                | 3 | 18.25  | 0.001 | 162   | 27.00  | 118.52 |
| <b>142</b>                                    | G90.9 Disorder of the                                       | 4 | 18.05  | 0.001 | 21    | 3.50   | 357.14 |

|                                               |                                                                                       |   |       |       |     |        |        |
|-----------------------------------------------|---------------------------------------------------------------------------------------|---|-------|-------|-----|--------|--------|
|                                               | autonomic nervous system, unspecified                                                 |   |       |       |     |        |        |
| <b>162</b>                                    | G43.01 Migraine without aura, intractable                                             | 5 | 15.81 | 0.001 | 39  | 6.50   | 238.46 |
| <b>176</b>                                    | G43.009 Migraine without aura, not intractable, without status migrainosus            | 6 | 14.88 | 0.001 | 56  | 9.33   | 189.39 |
| <b>178</b>                                    | G43.00 Migraine without aura, not intractable                                         | 5 | 14.69 | 0.001 | 63  | 10.50  | 176.19 |
| <b>180</b>                                    | G04.81 Other encephalitis and encephalomyelitis                                       | 5 | 14.54 | 0.001 | 15  | 2.50   | 380.00 |
| <b>204</b>                                    | G44.8 Other specified headache syndromes                                              | 4 | 12.98 | 0.001 | 14  | 2.33   | 372.10 |
| <b>212</b>                                    | G47.3 Sleep apnea                                                                     | 4 | 12.32 | 0.002 | 253 | 42.17  | 75.48  |
| <b>235</b>                                    | G60-G65 Polyneuropathies and other disorders of the peripheral nervous system         | 2 | 11.33 | 0.002 | 23  | 3.83   | 265.54 |
| <b>237</b>                                    | G44.89 Other headache syndrome                                                        | 5 | 11.27 | 0.002 | 11  | 1.83   | 391.80 |
| <b>241</b>                                    | G43.019 Migraine without aura, intractable, without status migrainosus                | 6 | 11.09 | 0.002 | 29  | 4.83   | 231.26 |
| <b>250</b>                                    | G37.3 Acute transverse myelitis in demyelinating disease of central nervous system    | 4 | 10.75 | 0.005 | 6   | 1.00   | 500.00 |
| <b>280</b>                                    | G43.9 Migraine, unspecified                                                           | 4 | 9.16  | 0.014 | 39  | 6.50   | 176.92 |
| <b>H00-H59 Diseases of the eye and adnexa</b> |                                                                                       |   |       |       |     |        |        |
| <b>126</b>                                    | H00-H59 Diseases of the eye and adnexa                                                | 1 | 20.56 | 0.001 | 790 | 131.67 | 54.17  |
| <b>248</b>                                    | H49-H52 Disorders of ocular muscles, binocular movement, accommodation and refraction | 2 | 10.81 | 0.002 | 341 | 56.83  | 60.13  |
| <b>260</b>                                    | H52 Disorders of refraction and                                                       | 3 | 10.14 | 0.005 | 231 | 38.50  | 71.43  |

|                                                   | accommodation                                                         |   |        |       |       |        |        |
|---------------------------------------------------|-----------------------------------------------------------------------|---|--------|-------|-------|--------|--------|
| <b>I00-I99 Diseases of the circulatory system</b> |                                                                       |   |        |       |       |        |        |
| <b>29</b>                                         | I00-I99 Diseases of the circulatory system                            | 1 | 102.68 | 0.001 | 740   | 123.33 | 132.71 |
| <b>39</b>                                         | I30-I52 Other forms of heart disease                                  | 2 | 60.44  | 0.001 | 292   | 48.67  | 165.05 |
| <b>110</b>                                        | I49 Other cardiac arrhythmias                                         | 3 | 23.44  | 0.001 | 45    | 7.50   | 273.33 |
| <b>141</b>                                        | I49.8 Other specified cardiac arrhythmias                             | 4 | 18.10  | 0.001 | 28    | 4.67   | 306.85 |
| <b>154</b>                                        | I95-I99 Other and unspecified disorders of the circulatory system     | 2 | 16.34  | 0.001 | 50    | 8.33   | 212.12 |
| <b>172</b>                                        | I51 Complications and ill-defined descriptions of heart disease       | 3 | 15.28  | 0.001 | 52    | 8.67   | 199.88 |
| <b>173</b>                                        | I95 Hypotension                                                       | 3 | 15.24  | 0.001 | 37    | 6.17   | 240.36 |
| <b>211</b>                                        | I26-I28 Pulmonary heart disease and diseases of pulmonary circulation | 2 | 12.43  | 0.002 | 45    | 7.50   | 193.33 |
| <b>257</b>                                        | I40 Acute myocarditis                                                 | 3 | 10.27  | 0.005 | 14    | 2.33   | 329.18 |
| <b>258</b>                                        | I26 Pulmonary embolism                                                | 3 | 10.27  | 0.005 | 14    | 2.33   | 329.18 |
| <b>J00-J99 Diseases of the respiratory system</b> |                                                                       |   |        |       |       |        |        |
| <b>15</b>                                         | J00-J99 Diseases of the respiratory system                            | 1 | 234.13 | 0.001 | 1,867 | 311.17 | 125.60 |
| <b>35</b>                                         | J40-J47 Chronic lower respiratory diseases                            | 2 | 75.13  | 0.001 | 534   | 89.00  | 133.71 |
| <b>36</b>                                         | J45 Asthma                                                            | 3 | 73.86  | 0.001 | 512   | 85.33  | 135.56 |
| <b>63</b>                                         | J30-J39 Other diseases of upper respiratory tract                     | 2 | 43.01  | 0.001 | 370   | 61.67  | 120.53 |
| <b>68</b>                                         | J45.9 Other and unspecified asthma                                    | 4 | 39.96  | 0.001 | 152   | 25.33  | 188.20 |
| <b>70</b>                                         | J96-J99 Other diseases of the respiratory system                      | 2 | 34.25  | 0.001 | 309   | 51.50  | 117.48 |
| <b>79</b>                                         | J45.909 Unspecified asthma, uncomplicated                             | 6 | 30.15  | 0.001 | 108   | 18.00  | 194.44 |
| <b>85</b>                                         | J12.8 Other viral pneumonia                                           | 4 | 28.52  | 0.001 | 19    | 3.17   | 467.82 |
| <b>89</b>                                         | J96.0 Acute respiratory failure                                       | 4 | 26.97  | 0.001 | 65    | 10.83  | 241.64 |
| <b>92</b>                                         | J45.90 Unspecified asthma                                             | 5 | 26.54  | 0.001 | 126   | 21.00  | 166.67 |
| <b>96</b>                                         | J12 Viral pneumonia, not                                              | 3 | 25.75  | 0.001 | 24    | 4.00   | 400.00 |



|            |                                                                           |   |       |       |     |       |        |
|------------|---------------------------------------------------------------------------|---|-------|-------|-----|-------|--------|
|            | elsewhere classified                                                      |   |       |       |     |       |        |
| <b>103</b> | J00-J06 Acute upper respiratory infections                                | 2 | 24.94 | 0.001 | 391 | 65.17 | 87.20  |
| <b>104</b> | J09-J18 Influenza and pneumonia                                           | 2 | 24.74 | 0.001 | 110 | 18.33 | 172.78 |
| <b>111</b> | J35 Chronic diseases of tonsils and adenoids                              | 3 | 23.34 | 0.001 | 62  | 10.33 | 229.14 |
| <b>121</b> | J12.82 Pneumonia due to coronavirus disease 2019                          | 5 | 21.50 | 0.001 | 12  | 2.00  | 500.00 |
| <b>127</b> | J80-J84 Other respiratory diseases principally affecting the interstitium | 2 | 20.17 | 0.001 | 26  | 4.33  | 338.80 |
| <b>134</b> | J98 Other respiratory disorders                                           | 3 | 19.04 | 0.001 | 118 | 19.67 | 144.03 |
| <b>136</b> | J96.01 Acute respiratory failure with hypoxia                             | 5 | 18.70 | 0.001 | 35  | 5.83  | 277.36 |
| <b>152</b> | J45.4 Moderate persistent asthma                                          | 4 | 16.84 | 0.001 | 92  | 15.33 | 154.40 |
| <b>153</b> | J03 Acute tonsillitis                                                     | 3 | 16.54 | 0.001 | 20  | 3.33  | 350.45 |
| <b>155</b> | J96 Respiratory failure, not elsewhere classified                         | 3 | 16.25 | 0.001 | 190 | 31.67 | 102.08 |
| <b>170</b> | J45.99 Other asthma                                                       | 5 | 15.33 | 0.001 | 26  | 4.33  | 292.61 |
| <b>188</b> | J45.40 Moderate persistent asthma, uncomplicated                          | 5 | 14.00 | 0.001 | 75  | 12.50 | 156.00 |
| <b>200</b> | J80 Acute respiratory distress syndrome                                   | 3 | 13.06 | 0.001 | 10  | 1.67  | 438.92 |
| <b>208</b> | J45.990 Exercise induced bronchospasm                                     | 6 | 12.54 | 0.002 | 19  | 3.17  | 310.09 |
| <b>230</b> | J45.30 Mild persistent asthma, uncomplicated                              | 5 | 11.41 | 0.002 | 94  | 15.67 | 123.36 |
| <b>236</b> | J45.3 Mild persistent asthma                                              | 4 | 11.30 | 0.002 | 110 | 18.33 | 112.77 |
| <b>242</b> | J32 Chronic sinusitis                                                     | 3 | 11.09 | 0.002 | 29  | 4.83  | 231.26 |
| <b>247</b> | J20-J22 Other acute lower respiratory infections                          | 2 | 10.91 | 0.002 | 45  | 7.50  | 180.00 |
| <b>265</b> | J03.9 Acute tonsillitis, unspecified                                      | 4 | 9.92  | 0.008 | 12  | 2.00  | 350.00 |
| <b>269</b> | J35.3 Hypertrophy of tonsils with hypertrophy of adenoids                 | 4 | 9.77  | 0.008 | 17  | 2.83  | 288.69 |
| <b>270</b> | J81 Pulmonary edema                                                       | 3 | 9.71  | 0.010 | 8   | 1.33  | 426.32 |

|                                                                             |                                                                    |   |        |       |       |        |        |
|-----------------------------------------------------------------------------|--------------------------------------------------------------------|---|--------|-------|-------|--------|--------|
| <b>271</b>                                                                  | J35.0 Chronic tonsillitis and adenoiditis                          | 4 | 9.69   | 0.013 | 10    | 1.67   | 379.04 |
| <b>272</b>                                                                  | J35.01 Chronic tonsillitis                                         | 5 | 9.69   | 0.013 | 10    | 1.67   | 379.04 |
| <b>K00-K93 Diseases of the digestive system</b>                             |                                                                    |   |        |       |       |        |        |
| <b>53</b>                                                                   | K00-K93 Diseases of the digestive system                           | 1 | 49.78  | 0.001 | 1,366 | 227.67 | 64.71  |
| <b>125</b>                                                                  | K55-K64 Other diseases of intestines                               | 2 | 20.89  | 0.001 | 485   | 80.83  | 70.73  |
| <b>147</b>                                                                  | K59 Other functional intestinal disorders                          | 3 | 17.52  | 0.001 | 390   | 65.00  | 72.31  |
| <b>150</b>                                                                  | K59.0 Constipation                                                 | 4 | 17.06  | 0.001 | 375   | 62.50  | 72.80  |
| <b>169</b>                                                                  | K20-K31 Diseases of oesophagus, stomach and duodenum               | 2 | 15.57  | 0.001 | 291   | 48.50  | 79.38  |
| <b>171</b>                                                                  | K59.00 Constipation, unspecified                                   | 5 | 15.28  | 0.001 | 211   | 35.17  | 93.35  |
| <b>198</b>                                                                  | K52 Other and unspecified noninfective gastroenteritis and colitis | 3 | 13.24  | 0.001 | 70    | 11.67  | 157.07 |
| <b>213</b>                                                                  | K31.8 Other specified diseases of stomach and duodenum             | 4 | 12.30  | 0.002 | 30    | 5.00   | 240.00 |
| <b>263</b>                                                                  | K00-K14 Diseases of oral cavity, salivary glands and jaws          | 2 | 10.04  | 0.007 | 140   | 23.33  | 92.88  |
| <b>264</b>                                                                  | K52.9 Noninfective gastroenteritis and colitis, unspecified        | 4 | 10.03  | 0.007 | 54    | 9.00   | 155.56 |
| <b>L00-L99 Diseases of the skin and subcutaneous tissue</b>                 |                                                                    |   |        |       |       |        |        |
| <b>82</b>                                                                   | L00-L99 Diseases of the skin and subcutaneous tissue               | 1 | 29.50  | 0.001 | 672   | 112.00 | 71.43  |
| <b>179</b>                                                                  | L49-L54 Urticaria and erythema                                     | 2 | 14.59  | 0.001 | 44    | 7.33   | 213.78 |
| <b>189</b>                                                                  | L20-L30 Dermatitis and eczema                                      | 2 | 13.89  | 0.001 | 201   | 33.50  | 91.04  |
| <b>261</b>                                                                  | L30 Other and unspecified dermatitis                               | 3 | 10.06  | 0.005 | 47    | 7.83   | 168.20 |
| <b>279</b>                                                                  | L30.9 Dermatitis, unspecified                                      | 4 | 9.16   | 0.014 | 39    | 6.50   | 176.92 |
| <b>M00-M99 Diseases of the musculoskeletal system and connective tissue</b> |                                                                    |   |        |       |       |        |        |
| <b>18</b>                                                                   | M00-M99 Diseases of the musculoskeletal system                     | 1 | 172.11 | 0.001 | 2,571 | 428.50 | 89.50  |

|            |                                                                           |   |       |       |     |        |        |
|------------|---------------------------------------------------------------------------|---|-------|-------|-----|--------|--------|
|            | and connective tissue                                                     |   |       |       |     |        |        |
| <b>38</b>  | M79 Other and unspecified soft tissue disorders, not elsewhere classified | 3 | 61.70 | 0.001 | 341 | 56.83  | 153.39 |
| <b>41</b>  | M70-M79 Other soft tissue disorders                                       | 2 | 58.99 | 0.001 | 363 | 60.50  | 144.63 |
| <b>49</b>  | M25 Other joint disorder, not elsewhere classified                        | 3 | 53.27 | 0.001 | 571 | 95.17  | 107.00 |
| <b>50</b>  | M20-M25 Other joint disorders                                             | 2 | 52.61 | 0.001 | 918 | 153.00 | 82.35  |
| <b>52</b>  | M25.5 Pain in joint                                                       | 4 | 51.53 | 0.001 | 375 | 62.50  | 132.00 |
| <b>61</b>  | M79.1 Myalgia                                                             | 4 | 43.72 | 0.001 | 86  | 14.33  | 269.85 |
| <b>83</b>  | M79.10 Myalgia, unspecified site                                          | 5 | 29.36 | 0.001 | 41  | 6.83   | 324.60 |
| <b>90</b>  | M86-M90 Other osteopathies                                                | 2 | 26.97 | 0.001 | 89  | 14.83  | 203.44 |
| <b>100</b> | M02.3 Reiter's disease                                                    | 4 | 25.08 | 0.001 | 14  | 2.33   | 500.86 |
| <b>101</b> | M02 Postinfective and reactive arthropathies                              | 3 | 25.08 | 0.001 | 14  | 2.33   | 500.86 |
| <b>106</b> | M00-M02 Infectious arthropathies                                          | 2 | 24.43 | 0.001 | 19  | 3.17   | 436.28 |
| <b>112</b> | M02.30 Reiter's disease, unspecified site                                 | 5 | 23.29 | 0.001 | 13  | 2.17   | 499.08 |
| <b>123</b> | M79.6 Pain in limb, hand, foot, fingers and toes                          | 4 | 21.35 | 0.001 | 217 | 36.17  | 110.12 |
| <b>128</b> | M50-M54 Other dorsopathies                                                | 2 | 20.15 | 0.001 | 194 | 32.33  | 113.42 |
| <b>130</b> | M54 Dorsalgia                                                             | 3 | 19.76 | 0.001 | 172 | 28.67  | 119.74 |
| <b>133</b> | M89 Other disorders of bone                                               | 3 | 19.04 | 0.001 | 32  | 5.33   | 294.00 |
| <b>140</b> | M25.50 Pain in unspecified joint                                          | 5 | 18.10 | 0.001 | 47  | 7.83   | 232.06 |
| <b>151</b> | M30-M36 Systemic connective tissue disorders                              | 2 | 17.03 | 0.001 | 88  | 14.67  | 159.03 |
| <b>156</b> | M60-M63 Disorders of muscles                                              | 2 | 16.21 | 0.001 | 318 | 53.00  | 77.36  |
| <b>165</b> | M79.18 Myalgia, other site                                                | 5 | 15.74 | 0.001 | 45  | 7.50   | 220.00 |
| <b>168</b> | M62 Other disorders of muscle                                             | 3 | 15.57 | 0.001 | 313 | 52.17  | 76.35  |
| <b>183</b> | M79.60 Pain in limb,                                                      | 5 | 14.45 | 0.001 | 88  | 14.67  | 145.40 |

|                                                                                                        |                                                                                                 |   |          |       |       |        |        |
|--------------------------------------------------------------------------------------------------------|-------------------------------------------------------------------------------------------------|---|----------|-------|-------|--------|--------|
|                                                                                                        | unspecified                                                                                     |   |          |       |       |        |        |
| <b>185</b>                                                                                             | M25.56 Pain in knee                                                                             | 5 | 14.35    | 0.001 | 103   | 17.17  | 132.96 |
| <b>194</b>                                                                                             | M35 Other systemic involvement of connective tissue                                             | 3 | 13.42    | 0.001 | 40    | 6.67   | 214.84 |
| <b>199</b>                                                                                             | M35.7 Hypermobility syndrome                                                                    | 4 | 13.17    | 0.001 | 26    | 4.33   | 269.52 |
| <b>201</b>                                                                                             | M24.9 Joint derangement, unspecified                                                            | 4 | 13.06    | 0.001 | 10    | 1.67   | 438.92 |
| <b>210</b>                                                                                             | M62.8 Other specified disorders of muscle                                                       | 4 | 12.44    | 0.002 | 279   | 46.50  | 72.04  |
| <b>233</b>                                                                                             | M89.1 Physeal arrest                                                                            | 4 | 11.38    | 0.002 | 9     | 1.50   | 433.33 |
| <b>282</b>                                                                                             | M25.561 Pain in right knee                                                                      | 6 | 9.08     | 0.017 | 46    | 7.67   | 160.76 |
| <b>N00-N99 Diseases of the genitourinary system</b>                                                    |                                                                                                 |   |          |       |       |        |        |
| <b>137</b>                                                                                             | N17 Acute kidney failure                                                                        | 3 | 18.45    | 0.001 | 38    | 6.33   | 263.35 |
| <b>158</b>                                                                                             | N00-N99 Diseases of the genitourinary system                                                    | 1 | 15.99    | 0.001 | 615   | 102.50 | 54.15  |
| <b>192</b>                                                                                             | N17.9 Acute kidney failure, unspecified                                                         | 4 | 13.45    | 0.001 | 34    | 5.67   | 235.10 |
| <b>227</b>                                                                                             | N17-N19 Renal failure                                                                           | 2 | 11.55    | 0.002 | 64    | 10.67  | 153.05 |
| <b>259</b>                                                                                             | N80-N98 Noninflammatory disorders of female genital tract                                       | 2 | 10.25    | 0.005 | 186   | 31.00  | 80.65  |
| <b>R00-R99 Symptoms, signs and abnormal clinical and laboratory findings, not elsewhere classified</b> |                                                                                                 |   |          |       |       |        |        |
| <b>1</b>                                                                                               | R00-R99 Symptoms, signs and abnormal clinical and laboratory findings, not elsewhere classified | 1 | 1,145.85 | 0.001 | 5,963 | 993.83 | 158.49 |
| <b>4</b>                                                                                               | R00-R09 Symptoms and signs involving the circulatory and respiratory systems                    | 2 | 508.76   | 0.001 | 1,357 | 226.17 | 228.51 |
| <b>10</b>                                                                                              | R50-R69 General symptoms and signs                                                              | 2 | 299.48   | 0.001 | 1,606 | 267.67 | 155.91 |
| <b>13</b>                                                                                              | R06.0 Dyspnea                                                                                   | 4 | 245.38   | 0.001 | 250   | 41.67  | 382.36 |
| <b>17</b>                                                                                              | R06 Abnormalities of breathing                                                                  | 3 | 214.14   | 0.001 | 494   | 82.33  | 247.38 |
| <b>19</b>                                                                                              | R53 Malaise and fatigue                                                                         | 3 | 164.37   | 0.001 | 328   | 54.67  | 267.66 |
| <b>20</b>                                                                                              | R53.8 Other malaise and                                                                         | 4 | 149.00   | 0.001 | 265   | 44.17  | 284.88 |

|           |                                                                                           |   |        |       |       |        |        |
|-----------|-------------------------------------------------------------------------------------------|---|--------|-------|-------|--------|--------|
|           | fatigue                                                                                   |   |        |       |       |        |        |
| <b>21</b> | R40-R46 Symptoms and signs involving cognition, perception, emotional state and behaviour | 2 | 135.61 | 0.001 | 507   | 84.50  | 189.94 |
| <b>22</b> | R07 Pain in throat and chest                                                              | 3 | 131.20 | 0.001 | 189   | 31.50  | 319.05 |
| <b>24</b> | R10-R19 Symptoms and signs involving the digestive system and abdomen                     | 2 | 122.47 | 0.001 | 1,253 | 208.83 | 109.74 |
| <b>27</b> | R06.00 Dyspnea, unspecified                                                               | 5 | 106.60 | 0.001 | 90    | 15.00  | 420.00 |
| <b>28</b> | R06.02 Shortness of breath                                                                | 5 | 104.66 | 0.001 | 101   | 16.83  | 393.17 |
| <b>30</b> | R53.83 Other fatigue                                                                      | 5 | 96.11  | 0.001 | 185   | 30.83  | 273.01 |
| <b>32</b> | R00 Abnormalities of heart beat                                                           | 3 | 85.44  | 0.001 | 143   | 23.83  | 294.46 |
| <b>34</b> | R07.9 Chest pain, unspecified                                                             | 4 | 81.42  | 0.001 | 108   | 18.00  | 333.33 |
| <b>42</b> | R51 Headache                                                                              | 3 | 58.90  | 0.001 | 160   | 26.67  | 226.21 |
| <b>43</b> | R42 Dizziness and giddiness                                                               | 3 | 58.64  | 0.001 | 126   | 21.00  | 257.14 |
| <b>45</b> | R00.2 Palpitations                                                                        | 4 | 57.94  | 0.001 | 54    | 9.00   | 400.00 |
| <b>46</b> | R51.9 Headache, unspecified                                                               | 4 | 55.40  | 0.001 | 151   | 25.17  | 225.78 |
| <b>47</b> | R05 Cough                                                                                 | 3 | 53.96  | 0.001 | 267   | 44.50  | 162.92 |
| <b>56</b> | R06.09 Other forms of dyspnea                                                             | 5 | 48.36  | 0.001 | 33    | 5.50   | 463.64 |
| <b>57</b> | R25-R29 Symptoms and signs involving the nervous and musculoskeletal systems              | 2 | 47.51  | 0.001 | 263   | 43.83  | 153.25 |
| <b>60</b> | R07.8 Other chest pain                                                                    | 4 | 44.08  | 0.001 | 70    | 11.67  | 302.74 |
| <b>64</b> | R07.89 Other chest pain                                                                   | 5 | 42.30  | 0.001 | 62    | 10.33  | 316.26 |
| <b>65</b> | R11 Nausea and vomiting                                                                   | 3 | 41.47  | 0.001 | 318   | 53.00  | 128.30 |
| <b>69</b> | R10 Abdominal and pelvic pain                                                             | 3 | 38.64  | 0.001 | 488   | 81.33  | 97.96  |
| <b>73</b> | R43 Disturbances of smell and taste                                                       | 3 | 32.90  | 0.001 | 24    | 4.00   | 450.00 |
| <b>74</b> | R50 Fever of other and unknown origin                                                     | 3 | 32.54  | 0.001 | 166   | 27.67  | 160.21 |
| <b>76</b> | R70-R79 Abnormal                                                                          | 2 | 31.70  | 0.001 | 245   | 40.83  | 127.77 |

|            |                                                                                            |   |       |       |     |       |        |
|------------|--------------------------------------------------------------------------------------------|---|-------|-------|-----|-------|--------|
|            | findings on examination of blood, without diagnosis                                        |   |       |       |     |       |        |
| <b>77</b>  | R09 Other symptoms and signs involving the circulatory and respiratory system              | 3 | 30.64 | 0.001 | 189 | 31.50 | 144.44 |
| <b>78</b>  | R00.0 Tachycardia, unspecified                                                             | 4 | 30.15 | 0.001 | 66  | 11.00 | 254.55 |
| <b>84</b>  | R90-R96 Abnormal findings on diagnostic imaging and in function studies, without diagnosis | 2 | 28.55 | 0.001 | 233 | 38.83 | 124.05 |
| <b>86</b>  | R53.81 Other malaise                                                                       | 5 | 27.84 | 0.001 | 45  | 7.50  | 300.00 |
| <b>95</b>  | R05.3 Chronic cough                                                                        | 4 | 26.19 | 0.001 | 30  | 5.00  | 360.00 |
| <b>97</b>  | R53.82 Chronic fatigue, unspecified                                                        | 5 | 25.68 | 0.001 | 35  | 5.83  | 328.82 |
| <b>99</b>  | R41 Other symptoms and signs involving cognitive functions and awareness                   | 3 | 25.46 | 0.001 | 105 | 17.50 | 180.00 |
| <b>108</b> | R68 Other general symptoms and signs                                                       | 3 | 23.85 | 0.001 | 102 | 17.00 | 176.47 |
| <b>109</b> | R50.9 Fever, unspecified                                                                   | 4 | 23.46 | 0.001 | 127 | 21.17 | 155.08 |
| <b>113</b> | R19 Other symptoms and signs involving the digestive system and abdomen                    | 3 | 23.28 | 0.001 | 117 | 19.50 | 161.54 |
| <b>118</b> | R05.9 Cough, unspecified                                                                   | 4 | 21.87 | 0.001 | 146 | 24.33 | 138.39 |
| <b>119</b> | R11.10 Vomiting, unspecified                                                               | 5 | 21.77 | 0.001 | 150 | 25.00 | 136.00 |
| <b>122</b> | R29 Other symptoms and signs involving the nervous and musculoskeletal systems             | 3 | 21.37 | 0.001 | 155 | 25.83 | 132.29 |
| <b>124</b> | R20-R23 Symptoms and signs involving the skin and subcutaneous tissue                      | 2 | 20.91 | 0.001 | 195 | 32.50 | 115.38 |
| <b>129</b> | R43.9 Unspecified disturbances of smell and taste                                          | 4 | 19.87 | 0.001 | 14  | 2.33  | 457.94 |
| <b>131</b> | R55 Syncope and collapse                                                                   | 3 | 19.58 | 0.001 | 72  | 12.00 | 191.67 |

|            |                                                                                            |   |       |       |     |       |        |
|------------|--------------------------------------------------------------------------------------------|---|-------|-------|-----|-------|--------|
| <b>135</b> | R68.8 Other general symptoms and signs                                                     | 4 | 18.79 | 0.001 | 87  | 14.50 | 168.97 |
| <b>143</b> | R68.89 Other general symptoms and signs                                                    | 5 | 18.05 | 0.001 | 82  | 13.67 | 170.67 |
| <b>144</b> | R11.1 Vomiting                                                                             | 4 | 17.92 | 0.001 | 179 | 29.83 | 111.20 |
| <b>145</b> | R53.1 Weakness                                                                             | 4 | 17.72 | 0.001 | 63  | 10.50 | 195.24 |
| <b>149</b> | R06.8 Other abnormalities of breathing                                                     | 4 | 17.18 | 0.001 | 182 | 30.33 | 107.72 |
| <b>159</b> | R09.02 Hypoxemia                                                                           | 5 | 15.96 | 0.001 | 57  | 9.50  | 194.74 |
| <b>160</b> | R09.0 Asphyxia and hypoxemia                                                               | 4 | 15.96 | 0.001 | 57  | 9.50  | 194.74 |
| <b>163</b> | R10.8 Other abdominal pain                                                                 | 4 | 15.76 | 0.001 | 144 | 24.00 | 116.67 |
| <b>164</b> | R19.7 Diarrhea, unspecified                                                                | 4 | 15.74 | 0.001 | 74  | 12.33 | 167.64 |
| <b>167</b> | R11.0 Nausea                                                                               | 4 | 15.58 | 0.001 | 71  | 11.83 | 170.50 |
| <b>174</b> | R09.8 Other specified symptoms and signs involving the circulatory and respiratory systems | 4 | 15.11 | 0.001 | 127 | 21.17 | 122.01 |
| <b>175</b> | R10.84 Generalized abdominal pain                                                          | 5 | 15.01 | 0.001 | 139 | 23.17 | 115.80 |
| <b>187</b> | R29.90 Unspecified symptoms and signs involving the nervous system                         | 5 | 14.33 | 0.001 | 8   | 1.33  | 501.50 |
| <b>190</b> | R41.8 Other symptoms and signs involving cognitive functions and awareness                 | 4 | 13.69 | 0.001 | 83  | 13.83 | 145.84 |
| <b>191</b> | R63                                                                                        | 3 | 13.68 | 0.001 | 232 | 38.67 | 83.60  |
| <b>193</b> | R27 Other lack of coordination                                                             | 3 | 13.42 | 0.001 | 40  | 6.67  | 214.84 |
| <b>195</b> | R45 Symptoms and signs involving emotional state                                           | 3 | 13.36 | 0.001 | 114 | 19.00 | 121.05 |
| <b>196</b> | R13.1 Dysphagia                                                                            | 4 | 13.27 | 0.001 | 243 | 40.50 | 80.25  |
| <b>197</b> | R13 Aphagia and dysphagia                                                                  | 3 | 13.27 | 0.001 | 243 | 40.50 | 80.25  |
| <b>205</b> | R29.9 Unspecified symptoms and signs involving the nervous and musculoskeletal             | 4 | 12.88 | 0.001 | 12  | 2.00  | 400.00 |

|            |                                                                      |   |       |       |     |       |        |
|------------|----------------------------------------------------------------------|---|-------|-------|-----|-------|--------|
|            | systems                                                              |   |       |       |     |       |        |
| <b>206</b> | R45.1 Restlessness and agitation                                     | 4 | 12.88 | 0.001 | 12  | 2.00  | 400.00 |
| <b>209</b> | R79 Other abnormal findings of blood chemistry                       | 3 | 12.52 | 0.002 | 137 | 22.83 | 105.87 |
| <b>215</b> | R04 Hemorrhage from respiratory passages                             | 3 | 12.28 | 0.002 | 39  | 6.50  | 207.69 |
| <b>218</b> | R59 Enlarged lymph nodes                                             | 3 | 12.25 | 0.002 | 36  | 6.00  | 216.67 |
| <b>224</b> | R70                                                                  | 3 | 11.74 | 0.002 | 15  | 2.50  | 340.00 |
| <b>225</b> | R91.8 Other nonspecific abnormal finding of lung field               | 4 | 11.73 | 0.002 | 28  | 4.67  | 242.61 |
| <b>226</b> | R93 Abnormal findings on diagnostic imaging of other body structures | 3 | 11.64 | 0.002 | 50  | 8.33  | 176.11 |
| <b>228</b> | R46 Symptoms and signs involving appearance and behavior             | 3 | 11.53 | 0.002 | 86  | 14.33 | 130.29 |
| <b>231</b> | R09.81 Nasal congestion                                              | 5 | 11.41 | 0.002 | 94  | 15.67 | 123.36 |
| <b>234</b> | R94.31 Abnormal electrocardiogram [ECG] [EKG]                        | 5 | 11.35 | 0.002 | 61  | 10.17 | 155.65 |
| <b>238</b> | R41.0 Disorientation, unspecified                                    | 4 | 11.27 | 0.002 | 11  | 1.83  | 391.80 |
| <b>239</b> | R47-R49 Symptoms and signs involving speech and voice                | 2 | 11.26 | 0.002 | 72  | 12.00 | 141.67 |
| <b>243</b> | R91 Abnormal findings on diagnostic imaging of lung                  | 3 | 11.08 | 0.002 | 32  | 5.33  | 218.95 |
| <b>245</b> | R10.9 Unspecified abdominal pain                                     | 4 | 11.05 | 0.002 | 111 | 18.50 | 110.81 |
| <b>246</b> | R94.3 Abnormal results of cardiovascular function studies            | 4 | 10.98 | 0.002 | 62  | 10.33 | 151.69 |
| <b>251</b> | R46.8 Other symptoms and signs involving appearance and behavior     | 4 | 10.70 | 0.005 | 85  | 14.17 | 125.83 |
| <b>252</b> | R20 Disturbances of skin sensation                                   | 3 | 10.67 | 0.005 | 39  | 6.50  | 192.31 |
| <b>253</b> | R73.9 Hyperglycemia,                                                 | 4 | 10.52 | 0.005 | 27  | 4.50  | 233.33 |



|                                                                                   |                                                                                       |   |        |       |       |        |        |
|-----------------------------------------------------------------------------------|---------------------------------------------------------------------------------------|---|--------|-------|-------|--------|--------|
|                                                                                   | unspecified                                                                           |   |        |       |       |        |        |
| 266                                                                               | R57 Shock, not elsewhere classified                                                   | 3 | 9.92   | 0.008 | 12    | 2.00   | 350.00 |
| 268                                                                               | R30-R39 Symptoms and signs involving the urinary system                               | 2 | 9.89   | 0.008 | 162   | 27.00  | 85.19  |
| 273                                                                               | R94 Abnormal results of function studies                                              | 3 | 9.68   | 0.013 | 125   | 20.83  | 96.83  |
| 275                                                                               | R26                                                                                   | 3 | 9.50   | 0.013 | 20    | 3.33   | 260.36 |
| 277                                                                               | R04.0 Epistaxis                                                                       | 4 | 9.40   | 0.013 | 32    | 5.33   | 200.19 |
| 278                                                                               | R59.1 Generalized enlarged lymph nodes                                                | 4 | 9.28   | 0.014 | 15    | 2.50   | 300.00 |
| 281                                                                               | R73 Elevated blood glucose level                                                      | 3 | 9.09   | 0.016 | 64    | 10.67  | 134.30 |
| 283                                                                               | R11.2 Nausea with vomiting, unspecified                                               | 4 | 9.01   | 0.018 | 68    | 11.33  | 129.48 |
| <b>U00-U95 Codes for special purposes</b>                                         |                                                                                       |   |        |       |       |        |        |
| 2                                                                                 | U00-U49 Provisional assignment of new diseases of uncertain etiology or emergency use | 2 | 749.53 | 0.001 | 431   | 71.83  | 495.85 |
| 3                                                                                 | U00-U95 Codes for special purposes                                                    | 1 | 749.53 | 0.001 | 431   | 71.83  | 495.85 |
| 5                                                                                 | U09 Post COVID-19 condition                                                           | 3 | 492.73 | 0.001 | 275   | 45.83  | 500.04 |
| 6                                                                                 | U09.9 Post COVID-19 condition, unspecified                                            | 4 | 492.73 | 0.001 | 275   | 45.83  | 500.04 |
| 11                                                                                | U07.1 Emergency use of U07.1   COVID-19                                               | 4 | 274.14 | 0.001 | 153   | 25.50  | 500.00 |
| 12                                                                                | U07                                                                                   | 3 | 259.86 | 0.001 | 156   | 26.00  | 488.46 |
| <b>Z00-Z99 Factors influencing health status and contact with health services</b> |                                                                                       |   |        |       |       |        |        |
| 98                                                                                | Z00-Z99 Factors influencing health status and contact with health services            | 1 | 25.59  | 0.001 | 1,622 | 270.33 | 41.68  |
| 115                                                                               | Z69-Z76 Persons encountering health services in other circumstances                   | 2 | 22.63  | 0.001 | 212   | 35.33  | 115.11 |
| 229                                                                               | Z89 Acquired absence of limb                                                          | 3 | 11.44  | 0.002 | 13    | 2.17   | 360.83 |
| 240                                                                               | Z99.81 Dependence on                                                                  | 5 | 11.17  | 0.002 | 38    | 6.33   | 200.16 |

|                     |  |  |  |  |  |  |  |
|---------------------|--|--|--|--|--|--|--|
| supplemental oxygen |  |  |  |  |  |  |  |
|---------------------|--|--|--|--|--|--|--|

### **Acknowledgments**

The authors gratefully acknowledge the contributions of Miranda Higginbotham.

### **Funding Source**

This research was funded by the National Institutes of Health (NIH) Agreement OT2HL161847-01 as part of the Researching COVID to Enhance Recovery (RECOVER) program of research. The content is solely the responsibility of the authors and does not necessarily represent the official views of the RECOVER Program, the NIH or other funders.

## References:

1. RECOVER: Researching COVID to Enhance Recovery.
2. Younger DS. Post-acute sequelae of SARS-CoV-2 infection (PASC): peripheral, autonomic, and central nervous system features in a child. *Neurol Sci*. 2021;42(10):3959-63. doi:10.1007/s10072-021-05345-5
3. Pfaff ER, Girvin AT, Bennett TD, Bhatia A, Brooks IM, Deer RR, et al. Identifying who has long COVID in the USA: a machine learning approach using N3C data. *Lancet Digit Health*. 2022;4(7):e532-e41. doi:10.1016/S2589-7500(22)00048-6
4. Munipalli B, Seim L, Dawson NL, Knight D, Dabrh AMA. Post-acute sequelae of COVID-19 (PASC): a meta-narrative review of pathophysiology, prevalence, and management. *SN Compr Clin Med*. 2022;4(1):90. doi:10.1007/s42399-022-01167-4
5. Reese J, Blau H, Bergquist T, Loomba JJ, Callahan T, Laraway B, et al. Generalizable Long COVID Subtypes: Findings from the NIH N3C and RECOVER Programs. *medRxiv*. 2022. doi:10.1101/2022.05.24.22275398
6. Yoo SM, Liu TC, Motwani Y, Sim MS, Viswanathan N, Samras N, et al. Factors Associated with Post-Acute Sequelae of SARS-CoV-2 (PASC) After Diagnosis of Symptomatic COVID-19 in the Inpatient and Outpatient Setting in a Diverse Cohort. *J Gen Intern Med*. 2022;37(8):1988-95. doi:10.1007/s11606-022-07523-3
7. Zhang H, Zang C, Xu Z, Zhang Y, Xu J, Bian J, et al. Machine Learning for Identifying Data-Driven Subphenotypes of Incident Post-Acute SARS-CoV-2 Infection Conditions with Large Scale Electronic Health Records: Findings from the RECOVER Initiative. *medRxiv*. 2022. doi:10.1101/2022.05.21.22275412
8. Behnood SA, Shafran R, Bennett SD, Zhang AXD, O'Mahoney LL, Stephenson TJ, et al. Persistent symptoms following SARS-CoV-2 infection amongst children and young people: A meta-analysis of controlled and uncontrolled studies. *J Infect*. 2022;84(2):158-70. doi:10.1016/j.jinf.2021.11.011
9. Palacios S, Krivchenia K, Eisner M, Young B, Ramilo O, Mejias A, et al. Long-term pulmonary sequelae in adolescents post-SARS-CoV-2 infection. *Pediatr Pulmonol*. 2022. doi:10.1002/ppul.26059
10. Ashkenazi-Hoffnung L, Shmueli E, Ehrlich S, Ziv A, Bar-On O, Birk E, et al. Long COVID in Children: Observations From a Designated Pediatric Clinic. *Pediatr Infect Dis J*. 2021;40(12):e509-e11. doi:10.1097/INF.0000000000003285
11. Asadi-Pooya AA, Nemati M, Nemati H. 'Long COVID': Symptom persistence in children hospitalised for COVID-19. *J Paediatr Child Health*. 2022. doi:10.1111/jpc.16120
12. Buonsenso D, Munblit D, De Rose C, Sinatti D, Ricchiuto A, Carfi A, et al. Preliminary evidence on long COVID in children. *Acta Paediatrica*. 2021;110(7):2208-11.
13. Fainardi V, Meoli A, Chiopris G, Motta M, Skenderaj K, Grandinetti R, et al. Long COVID in Children and Adolescents. *Life (Basel)*. 2022;12(2). doi:10.3390/life12020285
14. Roge I, Smane L, Kivite-Urtane A, Pucuka Z, Racko I, Klavina L, et al. Comparison of Persistent Symptoms After COVID-19 and Other Non-SARS-CoV-2 Infections in Children. *Frontiers in Pediatrics*. 2021;9. doi:10.3389/fped.2021.752385

15. Thallapureddy K, Thallapureddy K, Zerda E, Suresh N, Kamat D, Rajasekaran K, et al. Long-Term Complications of COVID-19 Infection in Adolescents and Children. *Curr Pediatr Rep.* 2022;10(1):11-7. doi:10.1007/s40124-021-00260-x
16. Morrow AK, Ng R, Vargas G, Jashar DT, Henning E, Stinson N, et al. Postacute/Long COVID in Pediatrics: Development of a Multidisciplinary Rehabilitation Clinic and Preliminary Case Series. *Am J Phys Med Rehabil.* 2021;100(12):1140-7. doi:10.1097/PHM.0000000000001896
17. Brackel CLH, Lap CR, Buddingh EP, van Houten MA, van der Sande L, Langereis EJ, et al. Pediatric long-COVID: An overlooked phenomenon? *Pediatr Pulmonol.* 2021;56(8):2495-502. doi:10.1002/ppul.25521
18. Rao S, Lee GM, Razzaghi H, Lorman V, Mejias A, Pajor NM, et al. Clinical features and burden of post-acute sequelae of SARS-CoV-2 infection in children and adolescents: an exploratory EHR-based cohort study from the RECOVER program. *medRxiv.* 2022. doi:10.1101/2022.05.24.22275544
19. aapmr. CDC Announces Approval of ICD-10 Code for Post-Acute Sequelae of COVID-19. 2021.
20. Mejias A, Schuchard J, Rao S, Bennett TD, Jhaveri R, Thacker D, et al. Leveraging serology testing to identify children at risk for post-acute sequelae of SARS-CoV-2 infection: An EHR-based cohort study from the RECOVER program. *medRxiv.* 2022:2022.06.20.22276645. doi:10.1101/2022.06.20.22276645
21. Wang SV, Jin Y, Fireman B, Gruber S, He M, Wyss R, et al. Relative Performance of Propensity Score Matching Strategies for Subgroup Analyses. *American Journal of Epidemiology.* 2018;187(8):1799-807. doi:10.1093/aje/kwy049
22. Simon TD, Haaland W, Hawley K, Lambka K, Mangione-Smith R. Development and Validation of the Pediatric Medical Complexity Algorithm (PMCA) Version 3.0. *Acad Pediatr.* 2018;18(5):577-80. doi:10.1016/j.acap.2018.02.010
23. Rassen JA, Shelat AA, Myers J, Glynn RJ, Rothman KJ, Schneeweiss S. One-to-many propensity score matching in cohort studies. *Pharmacoepidemiol Drug Saf.* 2012;21 Suppl 2:69-80. doi:10.1002/pds.3263
24. Sun YX, Wang M, Yang MF, Zhan SY. [Review on tree-based scan statistic in drug and vaccine safety monitoring]. *Zhonghua Liu Xing Bing Xue Za Zhi.* 2021;42(7):1286-91. doi:10.3760/cma.j.cn112338-20201103-01297
25. Templeton AR, Maxwell T, Posada D, Stengård JH, Boerwinkle E, Sing CF. Tree scanning: a method for using haplotype trees in phenotype/genotype association studies. *Genetics.* 2005;169(1):441-53. doi:10.1534/genetics.104.030080
26. Kulldorff M. *TreeScan User Guide, v2.0.* 2020.
27. CDC. ICD-10-CM Tabular List of Diseases and Injuries. 2022.
28. Crook H, Raza S, Nowell J, Young M, Edison P. Long covid-mechanisms, risk factors, and management. *BMJ.* 2021;374:n1648. doi:10.1136/bmj.n1648
29. Rando HM, Bennett TD, Byrd JB, Bramante C, Callahan TJ, Chute CG, et al. Challenges in defining Long COVID: Striking differences across literature, Electronic Health Records, and patient-reported information. *medRxiv.* 2021. doi:10.1101/2021.03.20.21253896

30. Estiri H, Strasser ZH, Brat GA, Semenov YR, Consortium for Characterization of C-bEHR, Patel CJ, et al. Evolving phenotypes of non-hospitalized patients that indicate long COVID. *BMC Med.* 2021;19(1):249. doi:10.1186/s12916-021-02115-0
31. National Institute for Health and Care Excellence: Clinical Guidelines. COVID-19 rapid guideline: managing the long-term effects of COVID-19. London: National Institute for Health and Care Excellence (NICE) Copyright © NICE 2020.; 2020.
32. Asadi-Pooya AA, Nemati H, Shahisavandi M, Akbari A, Emami A, Lotfi M, et al. Long COVID in children and adolescents. *World J Pediatr.* 2021;17(5):495-9. doi:10.1007/s12519-021-00457-6
33. Osmanov IM, Spiridonova E, Bobkova P, Gamirova A, Shikhaleva A, Andreeva M, et al. Risk factors for post-COVID-19 condition in previously hospitalised children using the ISARIC Global follow-up protocol: a prospective cohort study. *European Respiratory Journal.* 2022;59(2):2101341. doi:10.1183/13993003.01341-2021
34. Radtke T, Ulyte A, Puhan MA, Kriemler S. Long-term Symptoms After SARS-CoV-2 Infection in Children and Adolescents. *JAMA.* 2021. doi:10.1001/jama.2021.11880
35. Borch L, Holm M, Knudsen M, Ellermann-Eriksen S, Hagstroem S. Long COVID symptoms and duration in SARS-CoV-2 positive children - a nationwide cohort study. *Eur J Pediatr.* 2022;181(4):1597-607. doi:10.1007/s00431-021-04345-z
36. Molteni E, Sudre CH, Canas LS, Bhopal SS, Hughes RC, Antonelli M, et al. Illness duration and symptom profile in symptomatic UK school-aged children tested for SARS-CoV-2. *Lancet Child Adolesc Health.* 2021;5(10):708-18. doi:10.1016/S2352-4642(21)00198-X
37. Erol N, Alpınar A, Erol C, Sari E, Alkan K. Intriguing new faces of Covid-19: persisting clinical symptoms and cardiac effects in children. *Cardiol Young.* 2022;32(7):1085-91. doi:10.1017/s1047951121003693
38. Lopez-Leon S, Wegman-Ostrosky T, Ayuzo Del Valle NC, Perelman C, Sepulveda R, Rebolledo PA, et al. Long-COVID in children and adolescents: a systematic review and meta-analyses. *Sci Rep.* 2022;12(1):9950. doi:10.1038/s41598-022-13495-5
39. Groff D, Sun A, Ssentongo AE, Ba DM, Parsons N, Poudel GR, et al. Short-term and Long-term Rates of Postacute Sequelae of SARS-CoV-2 Infection: A Systematic Review. *JAMA Netw Open.* 2021;4(10):e2128568. doi:10.1001/jamanetworkopen.2021.28568
40. Barrett CE KA, Alvarez P, et al. Risk for Newly Diagnosed Diabetes >30 Days After SARS-CoV-2 Infection Among Persons Aged <18 Years — United States, March 1, 2020–June 28, 20212022.
41. Naendrup JH, Garcia Borrega J, Eichenauer DA, Shimabukuro-Vornhagen A, Kochanek M, Böll B. Reactivation of EBV and CMV in Severe COVID-19-Epiphenomena or Trigger of Hyperinflammation in Need of Treatment? A Large Case Series of Critically ill Patients. *J Intensive Care Med.* 2022;37(9):1152-8. doi:10.1177/08850666211053990
42. Dotan A, Muller S, Kanduc D, David P, Halpert G, Shoenfeld Y. The SARS-CoV-2 as an instrumental trigger of autoimmunity. *Autoimmun Rev.* 2021;20(4):102792. doi:10.1016/j.autrev.2021.102792
